Tazerart, Mitchell et al.

# A spike timing-dependent plasticity rule for single, clustered and distributed dendritic spines

Sabrina Tazerart<sup>1#</sup>, Diana E. Mitchell<sup>1#</sup>, Soledad Miranda-Rottmann<sup>1</sup>, and Roberto Araya<sup>1\*</sup>

<sup>1</sup>*Department of Neurosciences, Faculty of Medicine, University of Montreal*

<sup>#</sup>*These authors contributed equally to this work*

<sup>\*</sup>*Corresponding author*

**Correspondence:** Roberto Araya Ph.D. Assistant Professor, Department of Neurosciences, Faculty of Medicine, University of Montreal, C.P. 6128 Succursale Centre-Ville, Montreal, Quebec H3C 3J7, T: 514 343 7815, e-mail: roberto.araya@umontreal.ca

## ABSTRACT

Dendritic spines can undergo structural remodeling, and are the preferential site for the induction of long-term potentiation (LTP) and long-term depression (LTD). In a variant of LTP and LTD, known as spike-timing dependent plasticity (STDP), the sign and magnitude of the change in synaptic strength depends on the timing between the spikes of two connected neurons. Although STDP has been extensively studied in cortical pyramidal neurons, the precise structural organization of excitatory inputs that supports STDP, as well as the structural, molecular and functional properties of dendritic spines during STDP remain unknown. Here we developed a spine STDP protocol, in which two-photon glutamate uncaging over single or multiple spines from the basal dendrites of layer 5 pyramidal

Tazerart, Mitchell et al.

25 **neurons, which mimics presynaptic release of glutamate (pre), was paired with somatically**  
26 **generated postsynaptic spikes (post). We found that the induction of STDP in single spines**  
27 **follows a classical Hebbian STDP rule, where pre-post pairings at timings that trigger LTP**  
28 **(t-LTP) produce shrinkage of the activated spine neck and a concomitant increase in its**  
29 **synaptic strength; and post-pre pairings that trigger LTD (t-LTD) decrease synaptic**  
30 **strength without affecting the activated spine shape. Furthermore, we tested whether the**  
31 ***single spine*-Hebbian STDP rule could be affected by the activation of neighboring**  
32 **(clustered) or distant (distributed) spines. Our results show that the induction of t-LTP in**  
33 **two clustered spines (< 5  $\mu\text{m}$  apart) enhances LTP via a mechanism that is accompanied by**  
34 **local spine calcium increases that accumulates during the induction protocol, and that**  
35 **requires actin polymerization-dependent neck shrinkage, which permits AMPA receptor**  
36 **transport to the spine head and insertion into the postsynaptic density (PSD). Moreover, the**  
37 **induction of t-LTD is disrupted when two clustered spines are activated, with no calcium**  
38 **accumulation in spines or dendrites, but can be recovered if the activated spines are**  
39 **separated by > 40  $\mu\text{m}$ . These results indicate that the induction of STDP in single, or**  
40 **distributed spines, follow a Hebbian STDP rule. Interestingly, synaptic cooperativity,**  
41 **induced by the co-activation of only two clustered spines and the local spatio-temporal**  
42 **summation of clustered synaptic inputs, provides local dendritic depolarization and local**  
43 **calcium signals that are sufficient to disrupt t-LTD and extend the temporal window for the**  
44 **induction of t-LTP, leading to STDP only encompassing LTP.**

45

Tazerart, Mitchell et al.

46 Dendritic spines, the main recipient of excitatory information in the brain <sup>1</sup>, are tiny protrusions  
47 with a small head (~1  $\mu\text{m}$  in diameter and <1 fL volume) separated from the dendrite by a slender  
48 neck. Spines can undergo structural remodeling that is tightly coupled with synaptic function <sup>1-4</sup>,  
49 and are the preferential site for the induction of long-term potentiation (LTP) <sup>4-6</sup> and long-term  
50 depression (LTD) <sup>7</sup>, thought to be the underlying mechanisms for learning and memory in the brain  
51 <sup>8</sup>. A variation of LTP and LTD has been described in pyramidal neurons that involves the pairing  
52 of pre- and postsynaptic action potentials, known as spike-timing dependent plasticity (STDP) <sup>9</sup>,  
53 <sup>10</sup>. In this process, the timing between pre- and postsynaptic action potentials modulates synaptic  
54 strength, triggering LTP or LTD <sup>10</sup>. The sign and magnitude of the change in synaptic strength  
55 depends on the relative timing between spikes of two connected neurons (the pre- and postsynaptic  
56 neuron <sup>11</sup>). The STDP learning rules and their dependency on postsynaptic dendritic depolarization  
57 <sup>12, 13</sup>, firing rate <sup>12</sup>, and somatic distance of excitatory inputs <sup>13-15</sup> have been extracted from studies  
58 using connected neuronal pairs or by using extracellular stimulating electrodes, but the precise  
59 location and structural organization of excitatory inputs capable of supporting STDP at its minimal  
60 functional unit – the dendritic spine – are unknown.

61 Activity-dependent spine morphological changes (spine head <sup>4</sup>, neck <sup>2</sup>, or both <sup>16</sup>) have been  
62 correlated with changes in synaptic strength in cortical pyramidal neurons by mechanisms  
63 involving biochemical and electrical spine changes <sup>1, 6</sup>. Thus, here we asked what patterns of  
64 activity and structural organization of excitatory synaptic inputs support the generation of t-LTP  
65 and t-LTD, and which morphological, biophysical and molecular changes observed in dendritic  
66 spines can account for the induction of t-LTP and t-LTD?

67 To induce synapse-specific STDP we developed a protocol whereby two-photon (2P) uncaging of  
68 a caged glutamate (MNI-glutamate <sup>3</sup>) at a single spine – to mimic synaptic release – is preceded

Tazerart, Mitchell et al.

69 or followed in time (STDP timing window <sup>10</sup>) by a backpropagating action potential (bAP) to  
70 trigger t-LTP (Figure 1A, pre-post) or t-LTD (Figure 2A, post-pre), respectively. Postsynaptic  
71 spikes were triggered by current injection via a whole-cell recording pipette. Two-photon  
72 uncaging of a caged glutamate at a single spine triggered excitatory postsynaptic potentials  
73 (uncaging(u)EPSP) that were recorded in the soma of layer 5 (L5) pyramidal neurons before and  
74 after the induction of STDP, while the morphology of the activated spine neck and head was  
75 monitored (Figure 1A and 2A). To induce synapse-specific STDP and monitor calcium levels in  
76 the activated spines and parent dendrites we developed a protocol during which we perform nearly  
77 simultaneous 2P uncaging of glutamate and 2P calcium imaging of the activated spines and nearby  
78 dendrites.

79 Here, we provide evidence showing that the induction of STDP in single or distributed spines  
80 follows a bidirectional Hebbian STDP rule. Furthermore, we show that synaptic cooperativity,  
81 induced by the co-activation of only two clustered spines, disrupt t-LTD (< 40  $\mu\text{m}$  distance  
82 between spines) and extend the temporal window for the induction of t-LTP (< 5  $\mu\text{m}$  distance  
83 between spines) via the generation of differential local calcium signals leading to an STDP rule  
84 for clustered inputs only embracing LTP.

85

86

87

88

89

90

91



Tazerart, Mitchell et al.

92

## RESULTS

### 93 Induction of t-LTP in single dendritic spines

94 To induce t-LTP, we used a repetitive spike-timing protocol (40 times, 0.5 Hz) in which 2P  
95 uncaging of glutamate at a single spine was closely followed in time (+7 or +13 ms later, see  
96 Methods section) by a bAP (Figure 1A). We evaluated spine morphology and uEPSP amplitude  
97 for 40 min following STDP induction to establish the time course of STDP at individual synapses  
98 (Figure 1C.1 and D.1). In addition, the maximum uEPSP change and concomitant changes in spine  
99 morphology observed in each experiment are shown (Figure 1C.2 and D.2).

100 A repetitive pre-post pairing protocol of +13 ms reliably induced t-LTP (significant increase in the  
101 uEPSP amplitude over time,  $P < 0.001$ ,  $n = 7$  experiments, from 6 neurons, from 6 mice, Figure  
102 1B.1 and C.1), and shortening of the activated spine neck within a few minutes ( $P < 0.001$ ), with  
103 no significant change in spine head volume ( $n = 7$ , Figure 1B.2 and C.1). These results were also  
104 consistent when we considered the maximum uEPSP change in amplitude from each experiment  
105 and concomitant changes in spine morphology (uEPSP =  $134.21 \pm 3.29\%$ ,  $P < 0.001$ ,  $n = 7$ ; neck  
106 length =  $71.88 \pm 10.66\%$ ,  $P < 0.05$ ,  $n = 7$ ; spine head volume =  $98.11 \pm 7.34\%$ ,  $P = 0.81$ ,  $n = 7$ )  
107 (Figure 1C.2). We obtained similar results when we instead considered the average of all the values  
108 obtained following t-LTP induction for uEPSP amplitude, neck length and head volume  
109 (Supplementary Figure 1). This effect was specific to the activated spine (Figure 1B.2), with  
110 neighbouring spines having no appreciable changes in their neck length or head volume (neck  
111 length =  $98.09 \pm 5.06\%$ ,  $P = 0.71$ ,  $n = 13$ ; head volume =  $103.01 \pm 3.61\%$ ,  $P = 0.42$ ,  $n = 14$ ).  
112 Control experiments showed that there was no significant change in uEPSP amplitude or spine  
113 morphology following the STDP protocol when either action potentials or synaptic stimulation

Tazerart, Mitchell et al.

114 were applied in isolation, as well as when we monitored the long-term stability of these parameters  
115 without any STDP protocol (Supplementary Figure 2).

116 A pre-post pairing of + 7 ms showed a non-significant tendency for the induction of LTP following  
117 t-LTP induction, and a non-significant tendency for the shrinkage of the activated spine neck (n =  
118 8 experiments, from 8 neurons, from 8 mice, Figure 1D.1). When the maximum change in uEPSP  
119 amplitude from each experiment and the concomitant changes in spine morphology were analyzed,  
120 we saw no significant changes in uEPSP amplitude and spine morphology (Figure 1D.2, uEPSP =  
121  $112.27 \pm 14.19\%$ ,  $P = 0.42$ ,  $n = 8$ ; neck length =  $88.90 \pm 5.89\%$ ,  $P = 0.10$ ,  $n = 8$ ; head volume =  
122  $97.81 \pm 4.54\%$ ,  $P = 0.64$ ,  $n = 8$ ) (Figure 2E). Similar results were observed when we instead  
123 considered the average of all the values obtained following t-LTP (+7 ms) induction for uEPSP  
124 amplitude, neck length and head volume (Supplementary Figure 1). Because voltage has been  
125 shown to be an important factor in the induction of t-LTP and t-LTD, we verified that the initial  
126 uEPSP amplitudes were not significantly different for pre-post pairing protocols of +13 ms versus  
127 +7 ms (uEPSP:  $0.62 \pm 0.14$  versus  $0.53 \pm 0.16$  mV,  $P = 0.68$ ; Supplementary Figure 3).

128 These results indicate that there is a preferred pre-post t-LTP pairing time-window (+ 13 ms) at  
129 which activated spines in basal dendrites from L5 pyramidal neurons undergo a significant increase  
130 in synaptic strength, and a concomitant neck shrinkage (Figure 2E).

131

### 132 **Induction of t-LTD in single dendritic spines**

133 We then studied t-LTD in single spines by using a repetitive spike-timing protocol (40 times, 0.5  
134 Hz) in which 2P uncaging of glutamate at a single spine was preceded in time (-15 or -23 ms) by  
135 a bAP (post-pre protocol, Figure 2A). When postsynaptic spikes preceded presynaptic firing by 15  
136 ms (i.e., -15 ms), a significant reduction of the uEPSP amplitude occurred within a few minutes

Tazerart, Mitchell et al.

137 following induction of t-LTD (n= 6 experiments, from 5 neurons and 5 mice, Figure 2B.1 and C.1,  
138  $P < 0.001$ ), with no significant changes in spine neck length or head dimension (Figure 2B.2 and  
139 C.1). Furthermore, when the maximum change in uEPSP amplitude after the induction of t-LTD  
140 in single spines at pairings of -15 ms was analyzed (Figure 2C.2) we also observed a significant  
141 depression of uEPSP amplitude (uEPSP =  $71.52 \pm 7.07\%$ ,  $P < 0.01$ , n = 6), with no significant  
142 changes in spine morphology (Figure 2B.2 and C.2, neck length =  $105.54 \pm 9.85\%$ ,  $P = 0.62$ , n =  
143 6; head volume =  $103.25 \pm 3.02\%$ ,  $P = 0.33$ , n = 6). Interestingly, after the induction of t-LTD in  
144 single spines when postsynaptic spikes preceded presynaptic firing by 23 ms (i.e., -23ms) there  
145 were no significant changes in the amplitude of the uEPSPs or in the spine neck length and head  
146 dimensions for the duration of the recordings (n= 7 experiments, from 7 neurons and 7 mice, Figure  
147 2D.1). These results were also consistent with analyses of the maximal uEPSP change in each  
148 experiment and concomitant spine morphology (Figure 2D.2: uEPSP =  $82.09 \pm 9.89\%$ ,  $P = 0.12$ ,  
149 n = 7; neck length =  $84.15 \pm 7.73\%$ ,  $P = 0.09$ , n = 7; head volume =  $98.81 \pm 5.57\%$ ,  $P = 0.84$ , n =  
150 7). There was no significant difference between the initial EPSP amplitude for post-pre pairing  
151 protocols of -15 ms versus -23 ms (EPSP:  $0.59 \pm 0.07$  versus  $0.49 \pm 0.08$  mV,  $P = 0.42$ ;  
152 Supplementary Figure 3). We obtained similar results when we instead considered the average of  
153 all the values obtained following t-LTD induction in single spines for uEPSP amplitude, neck  
154 length and head volume (Supplementary Figure 1). This indicates that only a post-pre t-LTD  
155 pairing time-window of -15 ms can effectively induce LTD in single dendritic spines in the basal  
156 dendrites from L5 pyramidal neurons.

157 Taken together these results show that the induction of t-LTP and t-LTD in single spines follows  
158 a Hebbian-STDP learning rule that is bidirectional, and favors presynaptic inputs that precede  
159 postsynaptic spikes and depresses presynaptic inputs that are uncorrelated with postsynaptic spikes

Tazerart, Mitchell et al.

160 at a very precise and narrow temporal window (+13 ms for the generation of t-LTP and -15 ms for  
161 t-LTD, Figure 2E-F). The single spine STDP rule we observed has a narrower post-pre LTD  
162 induction pairing time window than previously observed in connected pairs of L2/3<sup>14, 17</sup> and L5  
163 pyramidal neurons<sup>12</sup> – where the presynaptic control of t-LTD via an mGluR and/or cannabinoid  
164 type 1 receptor-dependent mechanism<sup>18-21</sup> could plausibly account for these differences.

165

### 166 **Induction of t-LTP in clustered dendritic spines**

167 It has been suggested that STDP not only depends on spike timing and firing rate but also on  
168 synaptic cooperativity and the amount of voltage generated at the postsynaptic site<sup>12, 13</sup>. However,  
169 a direct demonstration of synaptic cooperativity at the level of single spines in the dendrites of  
170 pyramidal neurons remains unknown. Hence, an experiment was designed to directly test if  
171 synaptic cooperativity, marked by the co-induction of t-LTP in clustered dendritic spines from  
172 basal dendrites of L5 pyramidal neurons, and the local spatio-temporal summation of inputs, can  
173 generate a local dendritic depolarization and local calcium signals, that are high enough to disrupt  
174 the single spine STDP learning rule described in Figure 2E. To test this, a two spine STDP protocol  
175 (forty 2P uncaging pulses, pulse duration 2ms, 0.5Hz, see methods section) was performed,  
176 whereby 2P uncaging of caged glutamate in clustered (distance between spines < 5  $\mu$ m) spines  
177 was followed in time by a bAP to trigger t-LTP (Figure 3A). With this protocol, we investigated  
178 whether activating clustered spines extended the pre-post timing window capable of generating  
179 LTP by increasing the degree of depolarization immediately before the postsynaptic spike at  
180 timings where plasticity was not reliably generated. Specifically, we induced t-LTP in two  
181 clustered spines at pre-post timings of +7 ms, and surprisingly found that this protocol was in fact  
182 capable of effectively and significantly generating increases in uEPSP amplitude (Figure 3B.1)

Tazerart, Mitchell et al.

183 and the concomitant shrinkage of the activated spine neck, with no apparent changes in its spine  
184 head size (Figure 3B.2). Pooled data showed that significant increases in uEPSP amplitude and  
185 shrinkage of the spine neck of the activated spines occurs only a few minutes post t-LTP induction  
186 and lasted for the duration of the recordings (Figure 3C.1,  $P < 0.01$ ,  $n = 10$  spines from 8  
187 experiments, 6 neurons and 6 mice), with no significant changes in the spine head size (Figure  
188 3C.1,  $n = 16$  spines from 8 experiments, 6 neurons, 6 mice). Similar results were observed when  
189 we analyzed the maximal change in uEPSP amplitude in each experiment and the concomitant  
190 spine neck length and head size of the two clustered spines after induction of t-LTP at pairings of  
191 + 7 ms (Figure 3C.2; uEPSP =  $130.86 \pm 8.18\%$ ,  $P < 0.01$ ,  $n = 8$ ; neck length =  $73.22 \pm 5.84\%$ ,  $P <$   
192  $0.01$ ,  $n = 10$ ; head volume =  $102.00 \pm 2.58\%$ ,  $P = 0.45$ ,  $n = 16$ ). We obtained similar results when  
193 we instead considered the average of all the values obtained following t-LTP induction in two  
194 clustered spines for uEPSP amplitude, neck length and head volume (Supplementary Figure 1). In  
195 control experiments, no significant change in uEPSP amplitude or spine morphology was observed  
196 when we monitored the long-term stability of these parameters without any STDP protocol  
197 (Supplementary Figure 2). These results indicate that synaptic cooperativity – shown by the  
198 induction of t-LTP in only two clustered spines ( $< 5 \mu\text{m}$  apart) – is sufficient to significantly trigger  
199 synaptic potentiation and shrinkage of the activated spine necks at a pre-post timing that is  
200 otherwise ineffective at generating significant morphological changes and synaptic potentiation  
201 when only one spine is being activated (for comparison between one versus two cluster spines see  
202 Supplementary Figure 4). Hence, the synaptic cooperativity of only two neighbouring synaptic  
203 inputs onto spines ( $< 5 \mu\text{m}$  apart) in the basal dendrites of L5 pyramidal neurons extends the pre-  
204 post timing window that can trigger potentiation (Figure 3C.2, and compare Figure 3C.1 with  
205 Figure 1D.1).

Tazerart, Mitchell et al.

206

207 **Molecular mechanisms responsible for the generation of t-LTP in dendritic spines**

208 The results led us to consider the possible mechanisms underlying the generation of t-LTP at the  
209 level of single spines. Specifically, we asked why the induction of t-LTP in single and clustered  
210 spines is associated with the shrinkage of the activated spine neck. We and others have reported  
211 that the induction of LTP can trigger activity dependent changes in neck length<sup>2, 16</sup> and spine head  
212 size<sup>4, 6, 16</sup>, and that the amplitude of uEPSP recorded at the cell soma is inversely proportional to  
213 the length of the activated spine neck<sup>2, 22, 23</sup>. However the mechanisms by which the t-LTP-induced  
214 neck shrinkage is associated with synaptic plasticity remains unknown. Numerical simulations  
215 show that the EPSP amplitude/neck length correlation can be explained by variations in synaptic  
216 conductance, electrical attenuation through the neck, or a combination of the two<sup>2</sup>. Nevertheless,  
217 solutions that rely exclusively on the passive electrical attenuation of synaptic inputs through the  
218 spine neck assume very high (> 2 GOhm) neck resistance<sup>2</sup>, which are at odds with recent spine  
219 neck resistance estimations<sup>24, 25</sup>. These results suggest that the control of AMPA receptor content  
220 in spines could contribute significantly to the observed t-LTP-dependent changes in synaptic  
221 strength. To experimentally study the contribution of AMPA receptors to these phenomena, we  
222 performed t-LTP experiments in two clustered spines from L5 pyramidal neurons recorded via  
223 patch pipettes loaded with intracellular solution containing 200  $\mu$ M PEP1-TGL – a peptide that  
224 inhibits AMPA receptor incorporation to the postsynaptic density (PSD) by blocking GluR1 C-  
225 terminus interaction with PDZ domains at the PSD<sup>26</sup> (Figure 4A). PEP1-TGL incubation by itself  
226 did not trigger a run-down of uEPSP amplitude or changes in spine morphology over time  
227 (Supplementary Figure 5A). Pooled data from experiments where a repetitive pre-post pairing  
228 protocol of + 7 ms was used to activate clustered spines in the presence of PEP1-TGL show that

Tazerart, Mitchell et al.

229 the peptide completely inhibited t-LTP for the duration of the experiment (Figure 4B.1 and C.1),  
230 but had no effect on the t-LTP-induced shrinkage of the activated spine necks (Figure 4B.2 and  
231 C.1,  $P < 0.001$ ,  $n = 6$  spines, from 5 experiments, 5 neurons and 5 mice) or in modifying spine  
232 head size ( $n = 10$  spines, from 5 neurons and 5 mice, Figure 4C.1). Furthermore, when we analyzed  
233 the maximum change in uEPSP amplitude and the concomitant spine morphology after the  
234 induction of t-LTP in the presence of PEP1-TGL, we also found an inhibition of t-LTP, but no  
235 effect on the t-LTP-induced shrinkage of the spine neck (Figure 4B.2-C.2, uEPSP =  $94.82 \pm$   
236  $14.82\%$ ,  $P = 0.74$ ,  $n = 5$  experiments, from 5 neurons and 5 mice; neck length =  $83.92 \pm 5.35\%$ ,  $P$   
237  $< 0.05$ ,  $n = 6$ ; head volume =  $100.08 \pm 3.23\%$ ,  $P = 0.98$ ,  $n = 10$ ). We obtained similar results when  
238 we instead considered the average of all the values obtained following t-LTP induction in two  
239 clustered spines in the presence of PEP1-TGL for uEPSP amplitude, neck length and head volume  
240 (Supplementary Figure 1). No significant difference was observed between the initial uEPSP  
241 amplitude for pre-post pairing protocols of +7 ms with versus without PEP1-TGL (uEPSP:  $1.06 \pm$   
242  $0.2$  versus  $1.16 \pm 0.28$  mV,  $P = 0.81$ ; Supplementary Figure 3). These results indicate that GluR1  
243 receptor incorporation into the PSD - via its interaction with PDZ domains - is required for the  
244 induction of t-LTP in spines. However, the role of the spine neck shrinkage in AMPA receptor  
245 incorporation into the PSD and ultimately on the induction of t-LTP remains open.

246 Experimental and theoretical studies have indicated that lateral diffusion of AMPA receptors into  
247 and out of the spine head can be restricted by the spine neck geometry<sup>27-30</sup>. In particular, lateral  
248 diffusion of AMPA receptors into and out of mushroom spines (long-necked spines) has been  
249 shown to be significantly slower than that observed in stubby spines (small-necked spines)<sup>27</sup> –  
250 which is supported by studies that show reduced diffusion of membrane proteins located in spine  
251 necks<sup>31</sup>. In addition, quantitative models using realistic spine morphologies indicate that

Tazerart, Mitchell et al.

252 decreasing the radius and increasing the spine neck length increases the retention of AMPA  
253 receptors at the synapse<sup>29</sup>, even when their interaction with scaffolding cytoskeletal proteins is  
254 neglected<sup>30</sup>. Actin is highly enriched in the spine neck and head<sup>32</sup>, and plays an important role in  
255 anchoring AMPA receptors in the spine<sup>33</sup> and AMPA receptor trafficking<sup>34</sup>, being instrumental  
256 for synaptic transmission and plasticity<sup>35-37</sup>. Hence, to address the role that t-LTP-induced neck  
257 shrinkage has on AMPA receptor lateral trafficking to the PSD, and the generation of t-LTP in the  
258 activated spines we focused on actin dynamics. We used the actin polymerization inhibitor  
259 latrunculin A (Lat-A)<sup>33, 35, 37</sup> (Figure 4D) – which did not trigger any run-down of uEPSP  
260 amplitude or changes in spine morphology over time in the absence of STDP induction  
261 (Supplementary Figure 5B) – to test the potential role of actin dynamics on the spine induction of  
262 t-LTP, and on the neck shrinkage and AMPA receptor incorporation into the PSD in the activated  
263 spines (Figure 4D). The induction of t-LTP at pre-post pairings of +7 ms in two clustered spines  
264 in the presence of 100 nM Lat-A completely blocked the shrinkage of the activated spine necks  
265 and the induction of t-LTP (Figure 4E and F.1, n = 8 spines, from 3 neurons and 2 mice), inducing  
266 instead a significant reduction in uEPSP amplitude over time (Figure 4F.1, P < 0.001, n = 4  
267 experiments, from 3 neurons and 2 mice). These observations were also consistent with analyses  
268 of the maximal change in uEPSP amplitude in each experiment and concomitant spine morphology  
269 post t-LTP induction in the presence of Lat-A (Figure 4F.2, uEPSP =  $55.45 \pm 7.13\%$ , P < 0.01, n =  
270 4 experiments; neck length =  $87.20 \pm 9.15\%$ , P = 0.21, n = 8 spines; head volume =  $101.25 \pm$   
271  $10.99\%$ , P = 0.91, n = 8 spines).

272 We obtained similar results when we instead considered the average of all the values obtained  
273 following t-LTP induction in two clustered spines in the presence of 100 nM Lat-A for uEPSP  
274 amplitude, neck length and head volume (Supplementary Figure 1).



Tazerart, Mitchell et al.

275 No significant difference was observed between initial uEPSP amplitudes for pre-post pairing  
276 protocols of +7 ms with versus without Lat-A (uEPSP:  $0.94 \pm 0.20$  versus  $1.16 \pm 0.28$  mV,  $P =$   
277  $0.61$ ; Supplementary Figure 3). The lack of run-down of uEPSP amplitude over time in neurons  
278 treated with Lat-A in the absence of STDP induction (Supplementary Figure 5B), but the  
279 significant depression in uEPSP after the induction of t-LTP suggests that the induction of  
280 plasticity, and the rearrangement of actin filaments de-stabilized AMPA receptors, leading to  
281 removal from the PSD.

282 In summary, these results show that actin polymerization is required for the t-LTP-dependent neck  
283 shrinkage and the induction of plasticity. Our findings further suggest that the induction of t-LTP  
284 occurs via a mechanism that involves a neck-shrinkage-dependent facilitated diffusion of GluR1  
285 subunits from the spine neck to the head, and subsequent incorporation into the PSD. We  
286 hypothesize that a shorter and wider neck facilitates the transport of AMPA receptors into the spine  
287 head (Figure 4D), a mechanism that is required for the induction of t-LTP.

288

### 289 **Induction of t-LTD in clustered and distributed dendritic spines**

290 We then studied whether the induction t-LTD in single spines observed at pairings of -15 ms could  
291 be affected by synaptic cooperativity. Our reasoning was based on two previous observations  
292 which suggest that 1) t-LTP induction in the distal dendrites of L5 pyramidal neurons (layer 3- L5  
293 pyramidal neuron pairs) triggers LTD instead of LTP, and 2) that LTD can be converted into LTP  
294 by increasing the local voltage<sup>13</sup>. We hypothesised that the induction of t-LTD in single spines  
295 depends on the degree of local depolarization and hence, LTD can be disrupted by the activation  
296 of neighboring spines. To test this, we performed repetitive spike-timing protocol (40 times, 0.5  
297 Hz) in which 2P uncaging of glutamate at two spines (separated by up to 100  $\mu\text{m}$ ) was preceded

Tazerart, Mitchell et al.

298 in time (-15 ms) by a bAP (Figure 5D and Supplementary Figure 6A). Surprisingly, we found that  
299 this t-LTD protocol failed to induce any change in uEPSP amplitude or spine head volume with  
300 only a slight but significant reduction in spine neck length (Supplementary Figure 6B). When we  
301 analyzed the maximum uEPSP change in amplitude in each experiment and the concomitant  
302 morphological alterations in the activated spines after t-LTD induction, we observed a complete  
303 inhibition in the induction of t-LTD, and no change in spine morphology (Supplementary Figure  
304 6C; uEPSP =  $93.22 \pm 6.29\%$ ,  $P = 0.30$ ,  $n = 17$  experiments from 14 neurons and 14 mice; neck  
305 length =  $88.56 \pm 5.69\%$ ,  $P = 0.06$ ,  $n = 23$  spines; head volume =  $102.41 \pm 6.10\%$ ,  $P = 0.69$ ,  $n = 34$   
306 spines). To more precisely characterize the effect of activating two spines on the induction of t-  
307 LTD, we correlated the inter-spine distance and the uEPSP change following STDP induction (see  
308 Methods). We found that as the two activated spines were further away from each other, the more  
309 t-LTD was recovered (Supplementary Figure 6D). Specifically, the uEPSP change decayed  
310 exponentially as a function of inter-spine distance with a length constant ( $\lambda$ ) of  $43.5 \mu\text{m}$ . Therefore,  
311 we used this value as a boundary between clustered ( $< 40 \mu\text{m}$ ) and distributed ( $> 40 \mu\text{m}$ ) spines.  
312 Using this classification, clustered spines were located in the same dendrite ( $n = 11/12$  pairs) or in  
313 sister branches emanating from the same bifurcation point ( $n = 1/12$  pairs), while distributed spines  
314 were always located on separate dendrites ( $n = 5/5$  pairs). When we separated our data in this  
315 manner, the t-LTD protocol in two clustered spines (Figure 5A) failed to induce LTD (Figure 5B.1)  
316 or changes in spine head size at all the times tested post t-LTD induction (Figure 5B.2 and C.1,  $n$   
317 = 12 experiments,  $n = 24$  spines, from 11 neurons and 11 mice), with only a slight but significant  
318 induction of shrinkage of the spine neck at some time points (Figure 5C.1,  $P < 0.05$ ,  $n = 19$  spines,  
319 from 11 neurons and 11 mice). For comparison between the activation of one versus two clustered  
320 spines with a post-pre timing of -15 ms see Supplementary Figure 7. When we analyzed the

Tazerart, Mitchell et al.

321 maximum uEPSP change in amplitude in each experiment and the concomitant morphological  
322 alterations in the activated spines after t-LTD induction in two clustered spines, we also observed  
323 a complete inhibition in the induction of LTD, a slight but significant reduction in spine neck  
324 length, and no changes in spine head size (Figure 5C.2; uEPSP =  $101.70 \pm 7.02\%$ ,  $P = 0.81$ ,  $n =$   
325  $12$  experiments; neck length =  $85.28 \pm 5.96\%$ ,  $P < 0.05$ ,  $n = 19$  spines; head volume =  $102.98 \pm$   
326  $8.86\%$ ,  $P = 0.73$ ,  $n = 24$  spines, from 12 experiments performed in 11 neurons from 11 mice). We  
327 obtained similar results when we instead considered the average of all the values obtained  
328 following t-LTD induction in clustered spines for uEPSP amplitude, neck length and head volume  
329 (Supplementary Figure 1). These results were surprising since not only did we not observe t-LTD  
330 in clustered spines, but we also observed significant neck shrinkage with no LTP (see Figure 1 and  
331 3). To account for this observation, we explored if there was a correlation between the induction  
332 of plasticity in these experiments and both the shrinkage of the spine neck and the distance between  
333 the activated clustered spines – since the local voltage, and hence the induction of plasticity, could  
334 be affected by the distance between the activated clustered spines. Indeed, we found that the  
335 distance between the activated spines under these experimental conditions (t-LTD induction  
336 protocol in clustered spines) is correlated with the induction of plasticity and the shrinkage of the  
337 activated spine necks (Equation 1 in Methods;  $P < 0.01$ ; Supplementary Figure 6E). This analysis  
338 suggests that during t-LTD induction the structural arrangement of clustered spines ( $< 40 \mu\text{m}$ )  
339 determines the sign and magnitude of the change in synaptic strength and concomitant neck  
340 shrinkage.

341 We next investigated the mechanisms underlying the disruption of t-LTD by activating spines  
342 separated by increasingly larger distances (Figure 5D). Interestingly, the induction of t-LTD in  
343 spines separated by more than  $40 \mu\text{m}$  (distributed spines) was capable of recovering the generation

Tazerart, Mitchell et al.

344 of LTD (Figure 5E.1 and Supplementary Figure 6D). Pooled data from all experiments  
345 demonstrate that the activation of distributed spines reliably induces t-LTD (Figure 5F.1,  
346 significant reduction in uEPSP amplitude,  $P < 0.01$ ,  $n = 5$  experiments from 5 neurons and 5 mice),  
347 without triggering changes in neck length or spine head size (Figure 5E.2 and F.1). When we  
348 analyzed the maximal change in uEPSP amplitude in each experiment and concomitant spine  
349 morphological changes, we saw a significant induction of t-LTD and no change in spine  
350 morphology (Figure 5F.2, uEPSP =  $72.86 \pm 8.08\%$ ,  $P < 0.05$ ,  $n = 5$  experiments, neck length =  
351  $97.85 \pm 15.47\%$ ,  $P = 0.89$ ,  $n = 6$  spines; head volume =  $101.06 \pm 4.59\%$ ,  $P = 0.82$ ,  $n = 10$  spines)  
352 as what was found in experiments where t-LTD was generated at pairing times of -15 ms in single  
353 dendritic spines (Figure 2B-C). We obtained similar results when we instead considered the  
354 average of all the values obtained following t-LTD induction in distributed spines for uEPSP  
355 amplitude, neck length and head volume (Supplementary Figure 1). No significant difference was  
356 observed between the initial uEPSP amplitude for clustered versus distributed spines activated  
357 with post-pre pairings of -15 ms (EPSP:  $1.06 \pm 0.13$  versus  $1.31 \pm 0.19$  mV,  $P = 0.25$ ;  
358 Supplementary Figure 3). For comparison between the activation of clustered versus distributed  
359 spines after post-pre pairings of -15 ms, see Supplementary Figure 8.

360 In summary, this data shows that the induction of t-LTD at pairing times of -15 ms was completely  
361 disrupted when only two clustered spines ( $< 40 \mu\text{m}$  apart) were activated in the basal dendrites of  
362 L5 pyramidal neurons, but could be recovered if the activated spines are distributed ( $> 40 \mu\text{m}$ ) in  
363 the dendritic tree.

364

365 **Spine calcium transients during the induction of t-LTP and t-LTD in single and clustered**  
366 **dendritic spines**

Tazerart, Mitchell et al.

367 Calcium is critical for the induction of synaptic plasticity<sup>38-42</sup>, and high or low local concentration  
368 difference in dendrites and spines are thought to be associated with gating LTP or LTD,  
369 respectively<sup>43-45</sup>. Therefore, to investigate the different mechanisms – with respect to local calcium  
370 accumulations – underlying the induction of t-LTP and t-LTD in single versus two clustered  
371 spines, we performed 2P calcium imaging in a region of interest (ROI) of the activated spines and  
372 their parent dendrites during STDP induction protocols throughout each of the 40 pre-post or post-  
373 pre repetitions (see Methods). The “before” images correspond to the calcium signals observed in  
374 the ROI right before the pairing in each repetition – uncovering the lack or presence of local  
375 calcium accumulation during the 40 pairing repetitions. The “after” images correspond to the  
376 calcium signals observed in the ROI right after the pairing in each repetition – uncovering a proxy  
377 for the amplitude and local calcium accumulation during the 40 pairing repetitions.

378 To dissect potential differences in local calcium signals and accumulation that can account for the  
379 presence or absence of t-LTP and t-LTD induction in clustered versus distributed spines, we  
380 imaged 2P calcium activity during four different STDP induction protocols: (1) pre-post pairing  
381 of +7 ms in one spine; (2) pre-post pairing of +7 ms in two clustered spines; (3) post-pre pairing  
382 of -15 ms in one spine; (4) post-pre pairing of -15 ms in two clustered spines.

383 During the pre-post (+7 ms) pairing protocol in single spines we found that, across the 40  
384 repetitions, there was little to no calcium accumulation in the spine or dendrite (Figure 6A-B and  
385 left panels in Figure 6C,  $n = 7$  experiments, from 6 neurons, and 4 mice). As expected, there was,  
386 however, a significant increase in calcium immediately following the stimulation (left panels in  
387 Figure 6F) that due to the lack of accumulation throughout the 40 repetitions, did not build up a  
388 local calcium signal in the activated dendrites and spines. In contrast, when we applied the exact  
389 same pairing protocol (pre-post + 7ms) in two clustered spines, there was a striking calcium

Tazerart, Mitchell et al.

390 accumulation in both the activated spines and dendrite that was evident when we analyzed the  
391 images taken before (Figure 6D-E and middle panels in Figure 6C) and after stimulation (middle  
392 panels in Figure 6F,  $n = 6$  experiments, from 4 neurons, and 4 mice). Thus, activating just one  
393 additional spine using the same pairing protocol alters the calcium dynamics (compare black and  
394 green traces in right panels of Figure 6C and F), possibly through a mechanism that is incapable  
395 of extruding calcium increases in spines in between pre-post repetitions, leading to its build up in  
396 spines and parent dendrites, which ultimately guide the induction of plasticity.

397 We performed the same experiments with a post-pre (-15 ms) pairing protocol in both single and  
398 clustered spines. In single spines, we observed moderate calcium increases (Figure 7A-B, left  
399 panels in Figure 6C and F,  $n = 5$  experiments, from 4 neurons, and 4 mice) that were observed  
400 when we analyzed images taken before and after the post-pre stimulation. Surprisingly, we found  
401 similar results to those observed with single spine t-LTD induction protocols, when we applied the  
402 same pairing protocol in two clustered spines (Figure 7D-E, middle panels in Figure 7A and F,  $n$   
403  $= 6$  experiments, from 4 neurons, and 3 mice) even though no plasticity is induced in this condition.  
404 As suggested by previous studies<sup>46</sup>, we hypothesize that the range of spine calcium levels required  
405 for the induction of t-LTD is relatively narrow, and that the resolution with our current  
406 experimental set-up is not sufficient to tease apart significantly different calcium dynamics in one  
407 versus two clustered spines during a post-pre pairing protocol of -15 ms. Moreover, modeling  
408 STDP provide evidence that, in addition to overall calcium levels, the detailed time course of  
409 calcium levels in the postsynaptic cell during a pairing protocol also guide the induction of  
410 plasticity<sup>47</sup>. Nonetheless, these results suggest that the induction of t-LTD does not require  
411 significant calcium accumulations during the 40 repetitions, and most likely depends on the  
412 amplitude of calcium signals right after the stimulation. An interesting observation is that when

Tazerart, Mitchell et al.

413 we fit the calcium signals with a linear regression, the fits from all the different induction protocols  
414 have different slopes, which goes in line with our hypothesis (Supplementary Figure 9). More  
415 specifically, in single spines, a pre-post pairing protocol of +7 ms induced a relatively low calcium  
416 signal with a shallow slope (black lines in Supplementary Figure 9) whereas in clustered spines  
417 this same protocol caused a robust increase in calcium with a steep slope (blue lines in  
418 Supplementary Figure 9). A post-pre pairing protocol of -15 ms, caused a modest increase in  
419 calcium in both single and clustered spines before the stimulation (red and green lined in left panels  
420 of Supplementary Figure 9), whereas after the stimulation the calcium increase is more prominent  
421 in clustered spines (red and green lined in right panels of Supplementary Figure 9). These results  
422 provide evidence that the calcium levels needed to induce of t-LTD are restricted to a narrow range  
423 and that surpassing this range biases towards the induction of weak levels of LTP.

Tazerart, Mitchell et al.

424

## DISCUSSION

425

426

427

428

429

430

431

432

433

434

435

436

437

438

439

440

441

442

443

444

445

We uncovered the STDP rules for single, clustered and distributed dendritic spines in the basal dendrites of L5 pyramidal neurons. Our results show that the induction of STDP in single spines follows a classical Hebbian STDP learning rule that is bidirectional, in which presynaptic input leading postsynaptic spikes generates t-LTP and postsynaptic spikes preceding presynaptic activation of single dendritic spines results in t-LTD. Furthermore, we found that the induction of t-LTP triggers the shrinkage of the activated spine neck, without any significant changes in the spine head size. Our results indicate that the induction of t-LTP requires 1) the incorporation of new GluR-1 receptors with PDZ-domain containing proteins in the PSD and, 2) an actin polymerization-dependent neck shrinkage of the activated spine neck (Figure 4). We showed that the induction of t-LTP triggers actin-dependent neck shrinkage, which is likely required for the lateral diffusion of GluR-1 receptors from the spine neck to the spine head, and its incorporation to the PSD – generating plasticity. In support of this spine mechanism of LTP induction is a recent report showing that AMPA receptor surface diffusion is fundamental for the induction of hippocampal LTP and contextual learning<sup>48</sup>. In addition, we found that the induction of t-LTD was not accompanied with spine neck or head changes, which is at odds with previous findings suggesting structural changes in spine head volume during the induction of LTP or LTD<sup>4, 7, 49</sup>. The discrepancy between our results and those observed previously after the induction of t-LTP (head enlargement<sup>49</sup>), LTP<sup>4</sup>, or LTD (head shrinkage,<sup>7</sup>) using glutamate uncaging are likely explained by methodological differences. While our data was obtained using ACSF with physiological concentrations of magnesium and calcium, those from other reports were done in a magnesium-free ACSF<sup>4, 7</sup>, low calcium extracellular solution for the induction of LTD<sup>7</sup>, or in a magnesium-



Tazerart, Mitchell et al.

446 free ACSF and an intracellular solution containing 5  $\mu$ M actin that was required for the t-LTP-  
447 mediated spine head enlargements <sup>49</sup>.  
448 Nonetheless, it has been shown in vivo that a spike-timing protocol triggers receptive field  
449 plasticity in layer 2/3 pyramidal neurons is correlated with spine head volume changes  
450 (enlargement and shrinkage) observed after 1.5-2 hours <sup>50</sup>. Taken together, our data suggest that  
451 there is a new form of structural spine plasticity during t-LTP that involves rapid neck shrinkage  
452 without head volume enlargements. In addition, we show that the induction of t-LTD does not  
453 require structural spine changes. Although spines have the machinery and do undergo structural  
454 head changes, we propose that our results represent a stage during memory formation that occurs  
455 before structural head volume changes, a process likely linked with memory consolidation.  
456 Importantly, our data suggest that during STDP, the use of spine volume changes as the sole proxy  
457 for LTP or LTD <sup>50</sup> is not a complete representation of plasticity in spines from dendrites in cortical  
458 pyramidal neurons.  
459 We then explored the functional consequences of synaptic cooperativity on STDP. Our results  
460 show that the induction of t-LTP in two clustered spines - separated by less than 5  $\mu$ m - is sufficient  
461 to induce LTP and shrinkage of the activated spine necks at a pre-post timing that is otherwise  
462 ineffective at triggering significant morphological changes and synaptic potentiation when only  
463 one spine is being activated. These results show that the activation of clustered spines extends the  
464 pre-post timing window that can trigger potentiation. On the other hand, the induction of t-LTD in  
465 two clustered spines disrupts the generation of LTD leading to a STDP learning rule that is  
466 incapable of supporting LTD, but only encompasses LTP (Figure 8A). We next investigated the  
467 dendritic mechanisms responsible for the disruption of t-LTD, and found that the induction of t-  
468 LTD is fully recovered when the activated spines are separated by more than 40  $\mu$ m (Figure 5,

Tazerart, Mitchell et al.

469 Figure 8A and Supplementary Figure 6). Interestingly, the effective length constant ( $\lambda$ ), that  
470 represents the length at which the electrotonic potential decays to a value of 37% of that at the  
471 point of origin, in the basal dendrites of L5 pyramidal neurons has been reported to be  $50 \mu\text{m}$ <sup>51</sup>.  
472 This value of  $\lambda$  supports the idea that significant voltage attenuations – capable of recovering LTD  
473 – can be expected when the t-LTD induction protocol is triggered in spines that are separated by  
474 more than  $40 \mu\text{m}$  in the basal dendrites of L5 pyramidal neurons (Figure 5 D-F). However, we  
475 cannot discard that other mechanisms, such as the diffusion of active molecules<sup>5</sup>, could contribute  
476 to the switch from LTD to no-LTD induction observed in distributed/single spines and clustered  
477 spines, respectively. These results are in discrepancy with observations showing that in connected  
478 pairs of L5-L5 pyramidal cells, t-LTD is reliably generated after post-pre pairing protocols<sup>12</sup>. A  
479 likely explanation for this apparent controversy is that the synaptic inputs from one L5 pyramidal  
480 neuron to another are distributed<sup>52</sup>. Importantly, clustered and distributed excitatory inputs have  
481 been described in the dendrites of pyramidal neurons both *in vitro* and *in vivo*<sup>1, 53-55</sup>. Our results  
482 clearly show the functional importance that the structural and temporal organization of excitatory  
483 synaptic inputs have on the induction of t-LTP and t-LTD, and how just two clustered excitatory  
484 synaptic inputs are capable of altering the STDP learning rule in the basal dendrites of L5  
485 pyramidal neurons (Figure 8A).  
486 How the synaptic activation of just one extra clustered spine is capable of (1) inducing t-LTP at a  
487 pre-post timing that is otherwise ineffective in inducing potentiation and (2) disrupting the  
488 induction of t-LTD? To explore the mechanisms that may be responsible for these observations  
489 we imaged local calcium signals in the activated spines and parent dendrites before and after each  
490 of the 40 pairings performed during t-LTP and t-LTD induction protocols. Our reasoning for  
491 performing these experiments was based on findings that different levels of depolarization gate

Tazerart, Mitchell et al.

492 local calcium signals, which depending on its magnitude and kinetics, can generate LTP (high  
493 calcium) or LTD induction (sustained but moderate calcium signals)<sup>9, 43, 56</sup>. In addition, calcium-  
494 based modeling studies of STDP have shown that different calcium dynamics mediate the  
495 induction of t-LTP versus t-LTD<sup>46, 47</sup>. Specifically, the calcium control hypothesis indicates that  
496 large levels of calcium (above a plasticity threshold,  $\Theta_p$ ) are thought to lead to t-LTP whereas more  
497 moderate, prolonged levels (between the depression threshold,  $\Theta_{dSTART}$ , and  $\Theta_{dSTOP}$ ) give rise to  
498 t-LTD and a mid-level range in which t-LTD does not occur (below  $\Theta_{dSTART}$ ) (Figure 8B)<sup>47, 57, 58</sup>.  
499 A major assumption of these models is infinite time constants for synaptic variables at resting  
500 calcium levels so that the synaptic changes do not to decay after the presentation of the stimulus  
501<sup>46</sup> - a significant constraint for the stabilization of synaptic changes. A potential solution to this  
502 problem is the degree of local calcium accumulation observed in the activated spines throughout  
503 the t-LTP or t-LTD induction protocol. In fact, these models are consistent, fundamentally, with  
504 our results which show that a pre-post pairing (+7 ms) protocol in two clustered spines gives rise  
505 to t-LTP accompanied by a substantial increase in the intracellular calcium levels following each  
506 pairing repetition, and a significant accumulation of local calcium levels throughout the induction  
507 protocol – likely mediated by the inability of the two clustered activated spines to efficiently  
508 extrude the local calcium signals in between each pre-post pairing (Figure 6). We propose that the  
509 local spine calcium accumulation we observe provides a new and key variable for the induction of  
510 plasticity, which reduces the constraints imposed by calcium-base models for the stabilization of  
511 synaptic changes<sup>46, 47, 57, 58</sup>.  
512 These changes in local spine and dendritic calcium signals (Figure 6) suggest that perhaps  $\Theta_p$  can  
513 be reached only with ~ 10 pre-post pairings (~20-30 seconds). In contrast this same protocol in  
514 one spine induces no plasticity, producing calcium signals right after the pairing stimuli that are

Tazerart, Mitchell et al.

515 effectively extruded in between pairings leading to no calcium accumulation during the induction  
516 protocol (reaching levels below  $\Theta_p$  and  $\Theta_{dSTART}$ ; Figure 8B). These results suggest that it is not  
517 only the amplitude of the local calcium signals after each pairing, but also the local calcium  
518 accumulation during the induction protocol (40 pairings, ~80 seconds) in spines and dendrites that  
519 are required to reach  $\Theta_p$  for the induction of t-LTP in clustered spines. As mentioned before,  
520 recently it has been demonstrated in vivo that spike timing-induced receptive field plasticity, with  
521 millisecond time delays between visual stimulus (pre) and optogenetic stimulation in layer 2/3  
522 pyramidal neurons (post), is correlated with increases in synaptic strength<sup>50</sup>. These results together  
523 with evidence from other in vivo studies showing that layer 5 pyramidal neurons can spike up to  
524 frequencies of 20 Hz during movement<sup>59</sup>, suggest that our pairing protocol, and findings, are likely  
525 present under in vivo conditions and are relevant for plasticity of networks and ultimately  
526 behaviour.

527 Our results further show that a post-pre protocol of -15 ms in a single spine induces t-LTD and  
528 moderate intracellular calcium signals in spines and parent dendrites after each pairing, without an  
529 evident increase in local calcium accumulation. These results possibly reflect that the calcium  
530 signal generated during the induction protocol passed  $\Theta_{dSTART}$  and remain for several seconds in  
531 this permissive calcium concentration window – between  $\Theta_{dSTART}$  and  $\Theta_{dSTOP}$  – generating LTD  
532 (Figure 8B). Activating two clustered spines with the same protocol, however, does not induce  
533 plasticity and gives rise to an apparent smaller initial calcium accumulation than that observed  
534 with the activation of a single spine but with a slow build-up of calcium. These results possibly  
535 reflect that the spine calcium levels crossed  $\Theta_{dSTART}$  only after > 20 repetitions and then crossed  
536  $\Theta_{dSTOP}$  and  $\Theta_{pSTART}$  after a few (<10) repetitions reaching slightly higher local calcium levels. This  
537 calcium control hypothesis of t-LTD induction is based on the average linear fits of each

Tazerart, Mitchell et al.

538 experiment, and a tendency, that although clear, is not statistically significant with our  
539 measurements (Figure 8B and Supplementary Figure 9).

540 These findings presented here are quite remarkable since stimulating just one additional spine  
541 during a STDP protocol can completely alter the calcium dynamics and the induction of t-LTP and  
542 t-LTD. To our knowledge, this is the first demonstration of the functional relevance that the  
543 structural organization and simultaneous subthreshold activation of only a few clustered inputs in  
544 the dendrites of pyramidal neurons have on plasticity. We propose the term *micro clusters* to  
545 describe this structural and functional modality of synaptic connectivity. In fact, the relevance of  
546 synaptic *micro clusters* on the input/output properties of pyramidal neurons is also supported by  
547 three dimensional electron microscopy and neuronal reconstruction studies that have shown the  
548 presence of postsynaptic innervation of the same axon spaced at less than 10  $\mu\text{m}$  in the basal  
549 dendrites of L2/3 pyramidal neurons from the medial entorhinal cortex <sup>53</sup>, L5 pyramidal neurons  
550 from somatosensory cortex <sup>54</sup> and in the distal apical tuft dendrites in stratum lacunosum-  
551 moleculare of hippocampal CA1 pyramidal neurons <sup>55</sup>. In addition to having spines innervated by  
552 the same axon, it is likely that functional synaptic *micro clusters* can be gated by the convergence  
553 of different axons, which could increase the computational power of cortical circuits through a  
554 multi-neuronal control of synaptic cooperativity and ultimately the implemented STDP learning  
555 rule. Furthermore, recently it has been shown that orientation selectivity in visual cortex is  
556 correlated with the degree of spatial synaptic clustering of co-tuned synaptic inputs within the  
557 dendritic field <sup>60</sup>, and that functional clusters of dendritic spines separated by less than 10  $\mu\text{m}$  share  
558 similar spatial receptive field properties, spontaneous and sensory-driven activity <sup>61</sup>. Taken  
559 together these reported findings and our data suggest that the functional specificity and structural  
560 arrangement of synaptic inputs, distributed or forming *micro clusters* in the dendrites of pyramidal

Tazerart, Mitchell et al.

- 561 neurons, are fundamental for guiding the rules for sensory perception, affecting the STDP learning  
562 rule, learning and memory, and ultimately cognition.

Tazerart, Mitchell et al.

563

## METHODS

564 *Brain slice preparation and electrophysiology.* Brains from postnatal day 14-21 C57B/6 mice -  
565 anesthetized with isoflurane - were removed and immersed in cold (4°C) oxygenated sucrose  
566 cutting solution containing (in mM) 27 NaHCO<sub>3</sub>, 1.5 NaH<sub>2</sub>PO<sub>4</sub>, 222 Sucrose, 2.6 KCl, 1 CaCl<sub>2</sub>,  
567 and 3 MgSO<sub>4</sub>. Coronal brain slices (300- $\mu$ m-thick) of visual cortex were prepared as described<sup>22</sup>.

568 Brain slices were incubated for 1/2 hour at 32°C in artificial cerebrospinal fluid (ACSF, in mM:  
569 126 NaCl, 26 NaHCO<sub>3</sub>, 10 Dextrose, 1.15 NaH<sub>2</sub>PO<sub>4</sub>, 3 KCl, 2 CaCl<sub>2</sub>, 2MgSO<sub>4</sub>) and then  
570 transferred to a recording chamber. Electrophysiological recordings were performed in whole-cell  
571 current-clamp configuration with MultiClamp 700B amplifiers (Molecular Devices) in L5  
572 pyramidal neurons with a patch electrode (4-7 M $\Omega$ ) filled with internal solution containing (in  
573 mM) 0.1 Alexa Fluo 568, 130 D-Gluconic Acid, 2 MgCl<sub>2</sub>, 5 KCl, 10 HEPES, 2 MgATP, 0.3  
574 NaGTP, pH 7.4, and 0.4% Biocytin. All experiments were conducted at room temperature (~20-  
575 22°C). We did not extend our experiments to include voltage-clamp recordings since recent  
576 evidence indicates that the high spine neck resistance can prevent the voltage-clamp control of  
577 excitatory synapses and that these measurements can be significantly distorted in spiny neurons<sup>62</sup>.

578

579 *Two-photon imaging and two-photon uncaging of glutamate.* Two-photon imaging was performed  
580 with a custom-built two-photon laser scanning microscope, consisting of 1) a Prairie scan head  
581 (Bruker) mounted on an Olympus BX51WI microscope with a 60X, 0.9 N.A. water immersion  
582 objective; 2) a tunable Ti-Sapphire laser (Chameleon Ultra-II, Coherent, >3 W, 140-fs pulses, 80  
583 MHz repetition rate), 3) two photomultiplier tubes (PMT) for fluorescence detection. Fluorescence  
584 images were detected with Prairie software (Bruker).

585 Fifteen minutes after break-in, two-photon scanning images of basal dendrites were obtained with  
586 720 nm and low power (~5 mW on sample (i.e., after the objective)) excitation light and collected

Tazerart, Mitchell et al.

587 with a PMT. Two-photon uncaging of 4-methoxy-7-nitroindolyl (MNI)-caged L-glutamate (2.5  
588 mM; Tocris) was performed as previously described<sup>63</sup>. This concentration of MNI-glutamate  
589 completely blocked IPSCs<sup>64</sup>, thus, our results represent excitatory inputs only. Uncaging was  
590 performed at 720 nm (~25-30 mW on sample). Note that the laser power used for imaging is not  
591 sufficient to result in any partial uncaging of glutamate (Supplementary Figure 10). Activated  
592 spines were mostly on the second and third branch of the basal dendrites and were on average ~  
593 40  $\mu\text{m}$  away from the soma (Supplementary Figure 11). Only spines with a clear head contour and  
594 that were separated by  $>1 \mu\text{m}$  from neighboring spines were selected. The location of the uncaging  
595 spot was positioned at  $\sim 0.3 \mu\text{m}$  away from the upper edge of the selected spine head (red dot in  
596 figures), which has a spatial resolution of 0.71 and 0.88  $\mu\text{m}$  for one and two spines respectively  
597 (Supplementary Figure 12). Care was taken maintain the position of the uncaging spot. After each  
598 uncaging sequence, the spot was repositioned to keep the same distance of  $\sim 0.3 \mu\text{m}$  from the edge  
599 of the soma and to avoid artificial potentiation or depression. The uncaging-induced excitatory  
600 postsynaptic potentials (uEPSP) were recorded at the soma of L5 pyramidal neurons. The kinetics  
601 of uEPSPs from the present study are not significantly different (10/90 rate of rise:  $0.07 \pm 0.014$   
602 mV/ms,  $p=0.92$ ; duration:  $115.5 \pm 15.3 \text{ ms}$ ,  $p=0.65$ ) from those triggered at  $37^\circ\text{C}$ <sup>22</sup>.

603 *Spike timing-dependent plasticity (STDP) induction protocol:* To induce t-LTP in single spines,  
604 we used two-photon uncaging of MNI-glutamate (40 times every 2 seconds, with each uncaging  
605 pulse lasting 2 ms), which, after 7 or 13 ms, was followed by a backpropagating action potential  
606 (bAP) (triggered by a brief (10 ms) current injection (0.4 -0.6 nA) in the soma). To induce t-LTD  
607 in single spines, two-photon uncaging of MNI-glutamate (40 times every 2 seconds, with each  
608 uncaging pulse lasting 2 ms) was preceded for -15 or -23 ms by bAP. When we evaluated t-LTP  
609 and t-LTD in two spines, we used similar protocols to those described above, but the spines were



Tazerart, Mitchell et al.

610 activated with two-photon uncaging of MNI-glutamate sequentially with an onset delay of ~2.1  
611 ms for the second spine. No significant difference was observed in the in 10/90 rise time of the  
612 uEPSPs triggered when one versus two spines were activated ( $9.05 \pm 1.19$  ms versus  $9.49 \pm 0.54$   
613 ms, respectively;  $p=0.71$ ).

614 To evaluate the morphological and synaptic strength of the activated spines before and after the  
615 STDP induction protocol, we performed 2P imaging, and low frequency 2P uncaging (0.5 Hz) in  
616 single or multiple spines. To establish the time course of the changes in uEPSP amplitude, neck  
617 length and head volume following STDP induction, for each experiment, we interpolated the data  
618 taken at different time points using the *interp1* function in MATLAB (MathWorks) with the *pchip*  
619 option, which performs a shape-preserving piecewise cubic interpolation. Note that we constrained  
620 this fit so that it terminated with a slope of zero following the last data point. Then, for each  
621 condition, we averaged the uEPSP amplitude, neck length and head volume temporal traces. The  
622 length of the x-axis was set as the time at which the last data point was obtained for those sets of  
623 experiments. Shaded area represents  $\pm$ SE. To determine at which time the EPSP amplitude, neck  
624 length and head volume temporal traces are significantly different from baseline, we binned the  
625 temporal traces every 5min and tested whether it was significantly different from baseline (100%).  
626 The time at which the maximal change in uEPSP was observed after t-LTP and t-LTD induction  
627 was used to calculate the percent change from control, and the percent changes in neck length and  
628 head volume. These analyses are displayed in Figures 1 to 5.

629

630 *Experimental checkpoints and data analysis:* Electrophysiological data were analyzed with  
631 Wavemetrics software (Igor Pro) and MATLAB. The resting membrane potential of the recorded  
632 L5 pyramidal neurons was  $-58.27 \pm 2.08$  mV ( $n = 58$  neurons). After taking this measurement,

Tazerart, Mitchell et al.

633 pyramidal neurons were maintained at  $-65$  mV in current clamp configuration throughout the  
634 recording session. Only neurons for which the injected current to hold the cell at  $-65$  mV was  $<$   
635  $100$  pA were included in this study. For the generation of bAP, only action potentials with  
636 amplitude of  $> 45$  mV were considered for analysis. In most experiments, two control tests (each  
637 consisting of 10 uncaging pulses at 0.5 Hz), spaced by 5 min were performed to assess the  
638 reliability of the uEPSP amplitude. Only experiments for which uEPSP amplitudes were not  
639 significantly different before and after 5 minutes in control conditions were considered for analysis  
640 (less than 10% variation).

641 Synaptic plasticity was assessed by two parameters: the uEPSP amplitude and the spine  
642 morphology (neck length and head volume). The peak uEPSP amplitude was measured from each  
643 individual uEPSP by taking the peak value and averaging 2 ms before and after using Wavemetrics  
644 (Igor Pro). Only uEPSPs that were  $>0.1$  mV in the control condition (i.e., before the induction of  
645 plasticity) were included in the analysis.

646 Synaptic plasticity was determined by the relative change of uEPSP amplitude (average of 10  
647 uEPSP) measured before and after the STDP protocol. For each experiment, we evaluated whether  
648 the STDP protocol generated potentiation or depression by determining how many uEPSP data  
649 points fell above or below baseline values over the course of the experiment. Potentiation was  
650 defined as the majority of uEPSP amplitude data points measured over time increasing relative to  
651 baseline, and the maximum uEPSP increase was used for statistical test. Depression was defined  
652 as the majority of uEPSP amplitude data points measured over time decreasing relative to baseline,  
653 and the maximum uEPSP decrease was used for statistical test. The spike timings  $+7$  ms and  $+13$   
654 ms (pre leads post) or  $-23$  ms and  $-15$  ms (post leads pre) correspond to the delta time offset

Tazerart, Mitchell et al.

655 between the beginning of the uncaging pulse (pre) and the beginning of the bAP pulse (post)  
656 repeated 40 times.

657 The analysis of spines morphology was performed from z-projections of the whole spine using  
658 ImageJ<sup>65</sup> (neck length) and MATLAB (MathWorks) (head volume). The neck length was  
659 measured from the bottom edge of the spine head to the edge of its parent dendritic shaft using the  
660 segmented line tool in ImageJ. We selected mostly spines with a spine neck longer than 0.2  $\mu\text{m}$ .  
661 For those with a shorter neck, we did not report their length for analysis and statistics due to the  
662 diffraction limited resolution of our images. For spines whose necks shrunk after the STDP  
663 protocol below the diffraction limited resolution of our microscope, we set their length as the  
664 minimal measurement of spine neck length reported by Tonnesen et al., using STED microscopy  
665 (0.157  $\mu\text{m}$ )<sup>16</sup>. We estimated the relative spine head volume using the ratio of the maximum spine  
666 fluorescence and the maximum fluorescence observed in the dendrite measured from z-projections  
667 of the whole spine<sup>66,67</sup>. To obtain the spine volume, we then multiplied this ratio by the PSF of  
668 our microscope (0.11 fL)<sup>68</sup>. Linear optimization techniques were used to determine the correlation  
669 between EPSP change, neck length change and distance between 2 activated spines. Specifically,  
670 the change in EPSP amplitude was modeled using the following equation:

$$671 \quad uEPSP = c_1 \times NL + c_2 \times D \quad \text{Equation 1}$$

672 Where  $uEPSP$  and  $NL$  are the percent change in uEPSP and neck length, respectively, following  
673 the STDP protocol,  $D$  is the distance between the 2 spines, and  $c_1$ ,  $c_2$  and  $c_3$  are constant  
674 coefficients. These parameters were estimated using a least squares technique to obtain an optimal  
675 fit of the data that minimized the sum of the residuals squared. The relationship between inter-  
676 spine distance and the percent change in uEPSP was fit with the following exponential equation:

$$677 \quad y = \alpha e^{\frac{-x}{\lambda}} + \beta \quad \text{Equation 2}$$

Tazerart, Mitchell et al.

678 where  $\alpha$ ,  $\beta$  and  $\lambda$  are constants,  $y$  represents the change in uEPSP, and  $x$  is the inter-spine distance.

679

680 *Calcium imaging:* During calcium imaging experiments, we performed whole-cell current-clamp

681 recordings of L5 pyramidal neurons with a patch electrode containing calcium indicator Fluo-4

682 (300  $\mu$ M; Thermo Fisher) and Alexa-594 (100  $\mu$ M) diluted in an internal solution containing (in

683 mM) 130 D-Gluconic Acid, 2 MgCl<sub>2</sub>, 5 KCl, 10 HEPES, 2 MgATP, 0.3 NaGTP, pH 7.4, and 0.4%

684 Biocytin. To perform sequential 2P calcium imaging and 2P uncaging of caged glutamate in

685 selected spines at one wavelength (810 nm), we used ruthenium-bipyridine-trimethylphosphine

686 caged glutamate (RuBi-glu, Tocris)<sup>64</sup>, diluted into the bath solution for a final concentration of

687 600  $\mu$ M. Uncaging of Rubi-glu was performed at 810 nm (~25-30 mW on sample). The location

688 of the uncaging spot was positioned at ~ 0.3  $\mu$ m away from the upper edge of the selected spine

689 head (red dot in Figures 6-7). Changes in calcium were monitored by imaging 2P calcium signals

690 and detecting the fluorescence with 2 PMTs placed after wavelength filters (525/70 for green,

691 595/50 for red). We performed 2P calcium imaging during 4 different STDP induction protocols

692 triggered at 0.5Hz: (1) pre-post pairing of +7 ms in one spine; (2) pre-post pairing of +7 ms in two

693 clustered spines; (3) post-pre pairing of -15 ms in one spine; (4) post-pre pairing of -15 ms in two

694 clustered spines. We restricted the image acquisition to a small area (~150 x 150 pixels) which

695 contained the spine(s) that we uncaged and the shaft. Images were acquired at ~ 30 Hz, averaged

696 8 times, with 8  $\mu$ s dwell time. Calcium signals were imaged 500 ms before STDP induction

697 protocol and right after (4ms) the stimulation for more than 600 ms. We focused our analysis on

698 the images obtained before and immediately after the stimulation in each pairing repetition. ROI

699 drawing was performed using custom algorithms (MATLAB; MathWorks). For spine heads, the

700 ROI was a circle whereas for dendrites it was a polygon. Fluorescence was computed as the mean

Tazerart, Mitchell et al.

701 of all pixels within the ROI. We quantified the relative change in calcium concentration ( $\frac{\Delta F}{F}$ ) using  
702 the following formula:

$$703 \quad \frac{\Delta F}{F} = \frac{G - G_{baseline}}{R} \quad \text{Equation 3}$$

704 where  $G$  is the fluorescence from the Fluo-4 dye and  $R$  is the fluorescence from the Alexa-594  
705 dye.  $G_{baseline}$  is the mean of all pixels of Fluo-4 signal within the ROI taken from the first image  
706 at the first stimulation. We estimated the calcium signal during each condition and using the  
707 following equation:

$$708 \quad \frac{\widehat{\Delta F}}{F} = a \times x + b \quad \text{Equation 4}$$

709 where  $\frac{\widehat{\Delta F}}{F}$  is the estimated change in calcium signal,  $x$  is the repetition (binned every 5 repetitions),  
710  $a$  the slope and  $b$  a constant coefficient.

711 *Statistics:* Statistics were performed with GraphPad Prism 5. Statistical significance was  
712 determined using two-tailed Student's paired  $t$ -test when we analyzed the maximum change in  
713 uEPSP amplitude after the induction of t-LTP or t-LTD in each experiment and the concomitant  
714 changes in the activated spine morphology. Statistical significance was determined using one-way  
715 repeated measures ANOVA when we analyzed the time course of the uEPSP amplitude and spine  
716 morphological changes after induction of t-LTP or t-LTD with post-hoc pairwise comparisons  
717 using Dunnett's test. \* $P < 0.05$ ; \*\* $P < 0.01$ ; \*\*\* $P < 0.001$ .

718

719 *Pharmacology:* Latrunculin A (Lat-A, Tocris Bioscience) was dissolved in DMSO at 1/1000 and  
720 added to the recording chamber containing the brain slice at 100 nM for 15 min before starting the

Tazerart, Mitchell et al.

721 STDP protocol. PEP1-TGL (Tocris Bioscience) was added in the pipette at 200  $\mu$ M; after 15 min  
722 in whole cell condition, electrophysiological recording and synaptic plasticity experiments were  
723 started. MNI-glutamate (Tocris Bioscience) was diluted in ACSF from stock solution and bath  
724 applied at 2.5 mM. Fresh vials of MNI-glutamate were used for each experiment.

725

726

## ETHICS

727 *Animal experimentation:* these studies were performed in compliance with experimental protocols  
728 (13-185, 15-002, 16-011 and 17-012) approved by the *Comité de déontologie de l'expérimentation*  
729 *sur les animaux* (CDEA) of the University of Montreal.

730

## REFERENCES

- 731 1. Araya, R. Input transformation by dendritic spines of pyramidal neurons. *Frontiers in*  
732 *neuroanatomy* **8** (2014).
- 733 2. Araya, R., Vogels, T.P. & Yuste, R. Activity-dependent dendritic spine neck changes are correlated  
734 with synaptic strength. *Proceedings of the National Academy of Sciences of the United States of America*  
735 (2014).
- 736 3. Matsuzaki, M., *et al.* Dendritic spine geometry is critical for AMPA receptor expression in  
737 hippocampal CA1 pyramidal neurons. *Nature neuroscience* **4**, 1086-1092 (2001).
- 738 4. Matsuzaki, M., Honkura, N., Ellis-Davies, G.C.R. & Kasai, H. Structural basis of long-term  
739 potentiation in single dendritic spines. *Nature* **429**, 761-766 (2004).
- 740 5. Harvey, C.D., Yasuda, R., Zhong, H.N. & Svoboda, K. The spread of Ras activity triggered by  
741 activation of a single dendritic spine. *Science* **321**, 136-140 (2008).
- 742 6. Nishiyama, J. & Yasuda, R. Biochemical Computation for Spine Structural Plasticity. *Neuron* **87**, 63-  
743 75 (2015).
- 744 7. Oh, W.C., Hill, T.C. & Zito, K. Synapse-specific and size-dependent mechanisms of spine structural  
745 plasticity accompanying synaptic weakening. *Proceedings of the National Academy of Sciences of the*  
746 *United States of America* **110**, E305-312 (2013).
- 747 8. Hayashi-Takagi, A., *et al.* Labelling and optical erasure of synaptic memory traces in the motor  
748 cortex. *Nature* **525**, 333-+ (2015).
- 749 9. Feldman, D.E. The Spike-Timing Dependence of Plasticity. *Neuron* **75**, 556-571 (2012).
- 750 10. Bi, G.Q. & Poo, M.M. Synaptic modifications in cultured hippocampal neurons: dependence on  
751 spike timing, synaptic strength, and postsynaptic cell type. *The Journal of neuroscience : the official journal*  
752 *of the Society for Neuroscience* **18**, 10464-10472 (1998).
- 753 11. Zhang, L.I., Tao, H.W., Holt, C.E., Harris, W.A. & Poo, M.M. A critical window for cooperation and  
754 competition among developing retinotectal synapses. *Nature* **395**, 37-44 (1998).
- 755 12. Sjostrom, P.J., Turrigiano, G.G. & Nelson, S.B. Rate, timing, and cooperativity jointly determine  
756 cortical synaptic plasticity. *Neuron* **32**, 1149-1164 (2001).
- 757 13. Sjostrom, P.J. & Hausser, M. A cooperative switch determines the sign of synaptic plasticity in  
758 distal dendrites of neocortical pyramidal neurons. *Neuron* **51**, 227-238 (2006).
- 759 14. Froemke, R.C., Poo, M.M. & Dan, Y. Spike-timing-dependent synaptic plasticity depends on  
760 dendritic location. *Nature* **434**, 221-225 (2005).
- 761 15. Froemke, R.C., Letzkus, J.J., Kampa, B.M., Hang, G.B. & Stuart, G.J. Dendritic synapse location and  
762 neocortical spike-timing-dependent plasticity. *Frontiers in synaptic neuroscience* **2**, 29 (2010).
- 763 16. Tonnesen, J., Katona, G., Rozsa, B. & Nagerl, U.V. Spine neck plasticity regulates  
764 compartmentalization of synapses. *Nature neuroscience* **17**, 678-685 (2014).
- 765 17. Feldman, D.E. Timing-based LTP and LTD at vertical inputs to layer II/III pyramidal cells in rat barrel  
766 cortex. *Neuron* **27**, 45-56 (2000).
- 767 18. Nakamura, T., Barbara, J.G., Nakamura, K. & Ross, W.N. Synergistic release of Ca<sup>2+</sup> from IP<sub>3</sub>-  
768 sensitive stores evoked by synaptic activation of mGluRs paired with backpropagating action potentials.  
769 *Neuron* **24**, 727-737 (1999).
- 770 19. Hashimoto-dani, Y., *et al.* Phospholipase Cβ serves as a coincidence detector through its Ca<sup>2+</sup>  
771 dependency for triggering retrograde endocannabinoid signal. *Neuron* **45**, 257-268 (2005).
- 772 20. Bender, V.A., Bender, K.J., Brasier, D.J. & Feldman, D.E. Two coincidence detectors for spike  
773 timing-dependent plasticity in somatosensory cortex. *The Journal of neuroscience : the official journal of*  
774 *the Society for Neuroscience* **26**, 4166-4177 (2006).
- 775 21. Sjostrom, P.J., Turrigiano, G.G. & Nelson, S.B. Neocortical LTD via coincident activation of  
776 presynaptic NMDA and cannabinoid receptors. *Neuron* **39**, 641-654 (2003).



Tazerart, Mitchell et al.

- 777 22. Araya, R., Jiang, J., Eiselthal, K.B. & Yuste, R. The spine neck filters membrane potentials.  
778 *Proceedings of the National Academy of Sciences of the United States of America* **103**, 17961-17966  
779 (2006).
- 780 23. Richardson, R.J., Blundon, J.A., Bayazitov, I.T. & Zakharenko, S.S. Connectivity patterns revealed  
781 by mapping of active inputs on dendrites of thalamorecipient neurons in the auditory cortex. *The Journal*  
782 *of neuroscience : the official journal of the Society for Neuroscience* **29**, 6406-6417 (2009).
- 783 24. Harnett, M.T., Makara, J.K., Spruston, N., Kath, W.L. & Magee, J.C. Synaptic amplification by  
784 dendritic spines enhances input cooperativity. *Nature* **491**, 599-602 (2012).
- 785 25. Jayant, K., et al. Targeted intracellular voltage recordings from dendritic spines using quantum-  
786 dot-coated nanopipettes. *Nature nanotechnology* **12**, 335-342 (2017).
- 787 26. Hayashi, Y., et al. Driving AMPA receptors into synapses by LTP and CaMKII: requirement for GluR1  
788 and PDZ domain interaction. *Science* **287**, 2262-2267 (2000).
- 789 27. Ashby, M.C., Maier, S.R., Nishimune, A. & Henley, J.M. Lateral diffusion drives constitutive  
790 exchange of AMPA receptors at dendritic spines and is regulated by spine morphology. *The Journal of*  
791 *neuroscience : the official journal of the Society for Neuroscience* **26**, 7046-7055 (2006).
- 792 28. Holcman, D. & Triller, A. Modeling synaptic dynamics driven by receptor lateral diffusion.  
793 *Biophysical journal* **91**, 2405-2415 (2006).
- 794 29. Kusters, R., Kapitein, L.C., Hoogenraad, C.C. & Storm, C. Shape-induced asymmetric diffusion in  
795 dendritic spines allows efficient synaptic AMPA receptor trapping. *Biophysical journal* **105**, 2743-2750  
796 (2013).
- 797 30. Holcman, D. & Schuss, Z. Diffusion laws in dendritic spines. *Journal of mathematical neuroscience*  
798 **1**, 10 (2011).
- 799 31. Shim, S.H., et al. Super-resolution fluorescence imaging of organelles in live cells with  
800 photoswitchable membrane probes. *Proceedings of the National Academy of Sciences of the United States*  
801 *of America* **109**, 13978-13983 (2012).
- 802 32. Frost, N.A., Shroff, H., Kong, H.H., Betzig, E. & Blanpied, T.A. Single-Molecule Discrimination of  
803 Discrete Perisynaptic and Distributed Sites of Actin Filament Assembly within Dendritic Spines. *Neuron* **67**,  
804 86-99 (2010).
- 805 33. Allison, D.W., Gelfand, V.I., Spector, I. & Craig, A.M. Role of actin in anchoring postsynaptic  
806 receptors in cultured hippocampal neurons: Differential attachment of NMDA versus AMPA receptors.  
807 *Journal of Neuroscience* **18**, 2423-2436 (1998).
- 808 34. Hanley, J.G. Actin-dependent mechanisms in AMPA receptor trafficking. *Front Cell Neurosci* **8**  
809 (2014).
- 810 35. Kim, C.H. & Lisman, J.E. A role of actin filament in synaptic transmission and long-term  
811 potentiation. *Journal of Neuroscience* **19**, 4314-4324 (1999).
- 812 36. Honkura, N., Matsuzaki, M., Noguchi, J., Ellis-Davies, G.C.R. & Kasai, H. The subspine organization  
813 of actin fibers regulates the structure and plasticity of dendritic spines. *Neuron* **57**, 719-729 (2008).
- 814 37. Ramachandran, B. & Frey, J.U. Interfering with the actin network and its effect on long-term  
815 potentiation and synaptic tagging in hippocampal CA1 neurons in slices in vitro. *The Journal of*  
816 *neuroscience : the official journal of the Society for Neuroscience* **29**, 12167-12173 (2009).
- 817 38. Lynch, G., Larson, J., Kelso, S., Barrionuevo, G. & Schottler, F. Intracellular injections of EGTA block  
818 induction of hippocampal long-term potentiation. *Nature* **305**, 719-721 (1983).
- 819 39. Malenka, R.C., Kauer, J.A., Zucker, R.S. & Nicoll, R.A. Postsynaptic calcium is sufficient for  
820 potentiation of hippocampal synaptic transmission. *Science* **242**, 81-84 (1988).
- 821 40. Artola, A. & Singer, W. Long-term depression of excitatory synaptic transmission and its  
822 relationship to long-term potentiation. *Trends Neurosci* **16**, 480-487 (1993).
- 823 41. Cummings, J.A., Mulkey, R.M., Nicoll, R.A. & Malenka, R.C. Ca<sup>2+</sup> signaling requirements for long-  
824 term depression in the hippocampus. *Neuron* **16**, 825-833 (1996).



Tazerart, Mitchell et al.

- 825 42. Fino, E., *et al.* Distinct coincidence detectors govern the corticostriatal spike timing-dependent  
826 plasticity. *The Journal of physiology* **588**, 3045-3062 (2010).
- 827 43. Lisman, J. A mechanism for the Hebb and the anti-Hebb processes underlying learning and  
828 memory. *Proceedings of the National Academy of Sciences of the United States of America* **86**, 9574-9578  
829 (1989).
- 830 44. Ismailov, I., Kalikulov, D., Inoue, T. & Friedlander, M.J. The kinetic profile of intracellular calcium  
831 predicts long-term potentiation and long-term depression. *The Journal of neuroscience : the official*  
832 *journal of the Society for Neuroscience* **24**, 9847-9861 (2004).
- 833 45. Nevian, T. & Sakmann, B. Spine Ca<sup>2+</sup> signaling in spike-timing-dependent plasticity. *Journal of*  
834 *Neuroscience* **26**, 11001-11013 (2006).
- 835 46. Graupner, M. & Brunel, N. Mechanisms of induction and maintenance of spike-timing dependent  
836 plasticity in biophysical synapse models. *Frontiers in computational neuroscience* **4** (2010).
- 837 47. Rubin, J.E., Gerkin, R.C., Bi, G.Q. & Chow, C.C. Calcium time course as a signal for spike-timing-  
838 dependent plasticity. *J Neurophysiol* **93**, 2600-2613 (2005).
- 839 48. Penn, A.C., *et al.* Hippocampal LTP and contextual learning require surface diffusion of AMPA  
840 receptors. *Nature* **549**, 384-388 (2017).
- 841 49. Tanaka, J.I., *et al.* Protein synthesis and neurotrophin-dependent structural plasticity of single  
842 dendritic spines. *Science* **319**, 1683-1687 (2008).
- 843 50. El-Boustani, S., *et al.* Locally coordinated synaptic plasticity of visual cortex neurons in vivo.  
844 *Science* **360**, 1349-1354 (2018).
- 845 51. Nevian, T., Larkum, M.E., Polsky, A. & Schiller, J. Properties of basal dendrites of layer 5 pyramidal  
846 neurons: a direct patch-clamp recording study. *Nature neuroscience* **10**, 206-214 (2007).
- 847 52. Markram, H., Lubke, J., Frotscher, M., Roth, A. & Sakmann, B. Physiology and anatomy of synaptic  
848 connections between thick tufted pyramidal neurones in the developing rat neocortex. *J Physiol-London*  
849 **500**, 409-440 (1997).
- 850 53. Schmidt, H., *et al.* Axonal synapse sorting in medial entorhinal cortex. *Nature* **549**, 469-475 (2017).
- 851 54. Kasthuri, N., *et al.* Saturated Reconstruction of a Volume of Neocortex. *Cell* **162**, 648-661 (2015).
- 852 55. Bloss, E.B., *et al.* Single excitatory axons form clustered synapses onto CA1 pyramidal cell  
853 dendrites. *Nature neuroscience* **21**, 353-363 (2018).
- 854 56. Yang, S.N., Tang, Y.G. & Zucker, R.S. Selective induction of LTP and LTD by postsynaptic [Ca<sup>2+</sup>]<sub>i</sub>  
855 elevation. *J Neurophysiol* **81**, 781-787 (1999).
- 856 57. Karmarkar, U.R. & Buonomano, D.V. A model of spike-timing dependent plasticity: one or two  
857 coincidence detectors? *J Neurophysiol* **88**, 507-513 (2002).
- 858 58. Shouval, H.Z., Bear, M.F. & Cooper, L.N. A unified model of NMDA receptor-dependent  
859 bidirectional synaptic plasticity. *Proceedings of the National Academy of Sciences of the United States of*  
860 *America* **99**, 10831-10836 (2002).
- 861 59. Schiemann, J., *et al.* Cellular mechanisms underlying behavioral state-dependent bidirectional  
862 modulation of motor cortex output. *Cell Rep* **11**, 1319-1330 (2015).
- 863 60. Wilson, D.E., Whitney, D.E., Scholl, B. & Fitzpatrick, D. Orientation selectivity and the functional  
864 clustering of synaptic inputs in primary visual cortex. *Nature neuroscience* **19**, 1003-1009 (2016).
- 865 61. Scholl, B., Wilson, D.E., Fitzpatrick, D. Local Order within Global Disorder: Synaptic Architecture of  
866 Visual Space. in *Neuron* 1127-1138 (2017).
- 867 62. Beaulieu-Laroche, L. & Harnett, M.T. Dendritic Spines Prevent Synaptic Voltage Clamp. *Neuron* **97**,  
868 75-82 e73 (2018).
- 869 63. Araya, R., Eiselthal, K.B. & Yuste, R. Dendritic spines linearize the summation of excitatory  
870 potentials. *Proceedings of the National Academy of Sciences of the United States of America* **103**, 18799-  
871 18804 (2006).

Tazerart, Mitchell et al.

- 872 64. Fino, E., *et al.* RuBi-Glutamate: Two-Photon and Visible-Light Photoactivation of Neurons and  
873 Dendritic spines. *Frontiers in neural circuits* **3**, 2 (2009).
- 874 65. Rasband, W.S. & Bright, D.S. Nih Image - a Public Domain Image-Processing Program for the  
875 Macintosh. *Microbeam Anal* **4**, 137-149 (1995).
- 876 66. Nimchinsky, E.A., Yasuda, R., Oertner, T.G. & Svoboda, K. The number of glutamate receptors  
877 opened by synaptic stimulation in single hippocampal spines. *The Journal of neuroscience : the official*  
878 *journal of the Society for Neuroscience* **24**, 2054-2064 (2004).
- 879 67. Holtmaat, A.J., *et al.* Transient and persistent dendritic spines in the neocortex in vivo. *Neuron* **45**,  
880 279-291 (2005).
- 881 68. Ruttinger, S., *et al.* Comparison and accuracy of methods to determine the confocal volume for  
882 quantitative fluorescence correlation spectroscopy. *J Microsc* **232**, 343-352 (2008).

883

Tazerart, Mitchell et al.

884 **Acknowledgements.** We thank A. Kolta and P.J Sjöström for critical discussion and reading of  
885 the manuscript, and are grateful to all other members of Roberto Araya's laboratory for kind  
886 support. We also thank members of the *Groupe de Recherche sur le système nerveux central*  
887 (GRSNC) for support and equipment shearing. This work was funded by the Canadian Institutes  
888 of Health Research (CIHR) grant MOP-133711 to R.A., a Canada Foundation for Innovation (CFI)  
889 equipment grant *Fonds des leaders* 29970 to R.A., and a Natural Sciences and Engineering  
890 Research Council of Canada (NSERC Discovery Grant) grant application No. 418113-2012  
891 (NSERC PIN 392027) to R.A. S.T. was supported in part by a salary support from the GRSNC at  
892 Université of Montréal. D.E.M. was supported in part by a postdoctoral fellowship from the Fonds  
893 de recherche du Québec – Santé (FRQS).

894

895 **Author contributions.** R.A. conceived the project. S.T. and D.E.M. performed the experiments.  
896 S.T. and D.E.M. performed data analyses. S.M-R. performed control experiments. R.A., S.T.,  
897 and D.E.M. designed experiments. R.A. and D.E.M. wrote the manuscript. R.A. supervised the  
898 project. All authors read and approved the contents of the manuscript.

899

900 **Competing financial interests.** The authors declare no competing financial interest.

901

902 **Materials & Correspondence.** Correspondence and material requests should be addressed to R.A.

Tazerart, Mitchell et al.

903 **Figure 1: Induction of t-LTP in single dendritic spines.** (A) Experimental protocol for the  
904 induction of t-LTP with pre-post pairings (two-photon (2P) uncaging of glutamate followed by a  
905 bAP) of +7 and +13 ms in single dendritic spines (sp). (B) Example of a t-LTP protocol with pre-  
906 post pairing protocol of + 13 ms. (B.1) Average uEPSP response recorded via a whole-cell pipette  
907 at the soma of L5 pyramidal neurons before (Control) and after the induction of t-LTP in a selected  
908 dendritic spine located in basal dendrites (B.2). Traces in B.1 correspond to an average of 10  
909 depolarizations generated by 2P uncaging over the indicated spine (B.2 red dot) before (black  
910 trace) and after the induction of t-LTP (red trace). (C.1) Time course of uEPSP amplitude (black  
911 line), neck length (red line) and spine head volume (blue line) changes over the course of 40 min  
912 following STDP induction in individual spines at a pre-post timing of + 13 ms. *ns*, not significant;  
913 \**P* < 0.05; \*\**P* < 0.01; \*\*\**P* < 0.001, one-way repeated measures ANOVA followed by post hoc  
914 Dunnet's test. (C.2) Maximum changes in uEPSP amplitude (black bar and dots) and concomitant  
915 changes in neck length (red bar and dots) and head volume (blue bar and dots) of the activated  
916 spine after the induction of t-LTP at a pre-post timing of +13 ms. \**P* < 0.05, \*\*\**P* < 0.001, paired  
917 t-test. (D.1) Time course of uEPSP amplitude (black line), neck length (red line) and spine head  
918 volume (blue line) changes over the course of ~40 min following STDP induction in individual  
919 spines at a pre-post timing of + 7 ms. *ns*, not significant; \**P* < 0.05, one-way repeated measures  
920 ANOVA followed by post hoc Dunnet's test. (D.2) Maximum changes in uEPSP amplitude (black  
921 bar and dots) and corresponding changes in neck length (red bar and dots) and head volume (blue  
922 bar and dots) of the activated spine after the induction of t-LTP at a pre-post timing of +7 ms.  
923 Shaded light area in C.1 and D.1, and error bars in C.2 and D.2 represent  $\pm$ SEM. Time 0 in C.1  
924 and D.1 is the time when the 40 pre-post repetitions of the induction protocol were completed.  
925

Tazerart, Mitchell et al.

926 **Figure 2: Induction of t-LTD in single dendritic spines.** (A) Experimental protocol for the  
927 induction of t-LTD with post-pre pairings protocols of -15 and -23 ms in single dendritic spines.  
928 (B) Example of a t-LTD protocol with post-pre pairings protocol of -15 ms. (B.1) Average uEPSP  
929 response recorded via a whole-cell pipette at the soma of L5 pyramidal neurons before (Control)  
930 and after the induction of t-LTD in selected dendritic spines located in basal dendrites (B.2). Traces  
931 in B.1 correspond to an average of 10 uEPSP generated by the 2P uncaging of glutamate at the  
932 indicated spine (B.2, red dot) before (black trace) and after the induction of t-LTD (red trace).  
933 (C.1) Time course of uEPSP amplitude (black line), neck length (red line) and spine head volume  
934 (blue line) changes over the course of ~35 min following STDP induction in individual spines at  
935 a post-pre timing of -15 ms. *ns*, not significant; \*\*\* $P < 0.001$ , one-way repeated measures ANOVA  
936 followed by post hoc Dunnet's test. (C.2) Maximum changes in uEPSP amplitude (black bar and  
937 dots) and concomitant changes in neck length (red bar and dots) and head size of the activated  
938 spine (blue bar and dots) after the induction of t-LTD at a post-pre timing of -15 ms. \*\* $P < 0.01$ ,  
939 paired t test. (D.1) Time course of uEPSP amplitude (black line), neck length (red line) and spine  
940 head volume (blue line) changes over the course of ~ 40 min following STDP induction in  
941 individual spines at a post-pre timing of -23 ms. *ns*, not significant, one-way repeated measures  
942 ANOVA followed by post hoc Dunnet's test. (D.2) Maximum changes in uEPSP amplitude (black  
943 bar and dots) and corresponding changes in neck length (red bar and dots) and head volume (blue  
944 bar and dots) of the activated spine after the induction of t-LTD at a post-pre timing of -23 ms.  
945 Shaded light area in C.1 and D.1, and error bars in C.2 and D.2 represent  $\pm$ SEM. Time 0 in C.1  
946 and D.1 is the time when the 40 pre-post repetitions of the induction protocol were completed. (E)  
947 STDP learning rule for single dendritic spines: Plot illustrating the maximum changes in uEPSP  
948 amplitude (black data points), and concomitant changes in neck length (red data points) and head

Tazerart, Mitchell et al.

949 volume (blue data points) after the induction of t-LTP (temporal offset +13 ms and +7 ms) and t-  
950 LTD (temporal offset -15 ms and -23 ms). \*P < 0.05, \*\*P < 0.01, paired t test. (F) Diagram  
951 indicating the uEPSP amplitude and spine neck morphological changes observed after the  
952 induction of t-LTP and t-LTD.

Tazerart, Mitchell et al.

953 **Figure 3: Induction of t-LTP in clustered dendritic spines** (A) Experimental protocol for the  
954 induction of t-LTP (pre-post timing of + 7 ms) in two clustered dendritic spines (< 5  $\mu\text{m}$  distance  
955 between spines). (B) Example of one experiment where two neighbouring dendritic spines were  
956 activated with a pre-post t-LTP protocol. (B.1) Average uEPSP response recorded via a whole-cell  
957 pipette at the soma of L5 pyramidal neurons before (Control) and after the induction of t-LTP in  
958 two selected dendritic spines located in a basal dendrite (red dots, B.2). Traces in B.1 correspond  
959 to an average of 10 uEPSP generated by the 2P uncaging at the indicated spines (B.2) before (black  
960 trace) and after the induction of t-LTP (red trace). (C.1) Time course of uEPSP amplitude (black  
961 line), neck length (red line) and spine head volume (blue line) changes over the course of ~25 min  
962 following STDP induction in clustered spines at a pre-post timing of + 7 ms. *ns*, not significant;  
963  $**P < 0.01$ ,  $***P < 0.001$ , one-way repeated measures ANOVA followed by post hoc Dunnet's  
964 test. (C.2) Pooled data of the maximum changes in uEPSP amplitude (black bar and dots) and  
965 concomitant changes in neck length (red bar and dots) and head volume (blue bar and dots) of  
966 individual (1sp) or clustered spines (2sp) after the induction of t-LTP at a pre-post timing of +7ms.  
967  $**P < 0.01$ , paired t test. Shaded light area in C.1 and error bars in C.2 represent  $\pm\text{SEM}$ . Time 0 in  
968 C.1 is the time when the 40 pre-post repetitions of the induction protocol are completed. NL =  
969 neck length, HV = head volume.

Tazerart, Mitchell et al.

970 **Figure 4: Molecular mechanisms responsible for the induction of t-LTP.** (A) Experimental  
971 protocol for the induction of t-LTP (pre-post timing of + 7 ms) in two clustered dendritic spines  
972 (< 5  $\mu\text{m}$ ) in the presence of PEP1-TGL (200  $\mu\text{M}$ ). (B) An example of one experiment where two  
973 neighbouring dendritic spines were activated with a pre-post t-LTP protocol in the presence of  
974 PEP1-TGL. (B.1) Average uEPSP recorded via a whole-cell pipette at the soma of L5 pyramidal  
975 neurons before (Control) and after the induction of t-LTP in two selected dendritic spines located  
976 in basal dendrites (B.2). Traces in B.1 correspond to an average of 10 uEPSP generated by the 2P  
977 uncaging of glutamate at the two indicated spines (red dots, B.2) before (black trace) and after the  
978 induction of t-LTP in the presence of PEP1-TGL (red traces). (C.1) Time course of uEPSP  
979 amplitude (black line), neck length (red line) and spine head volume (blue line) changes over the  
980 course of ~28 min following STDP induction in clustered spines at a pre-post timing of + 7 ms in  
981 the presence of PEP1-TGL. *ns*, not significant; \*\* $P < 0.01$ , \*\*\* $P < 0.001$ , one-way repeated  
982 measures ANOVA followed by post hoc Dunnett's test. (C.2) Pooled data of the maximum changes  
983 in uEPSP amplitude (black bar and dots) and concomitant changes in neck length (red bar and  
984 dots) and head volume (blue bar and dots) of the activated clustered spines after the induction of  
985 t-LTP at a pre-post timing of +7ms in control conditions (Cont) and in the presence of PEP1-TGL  
986 (PEP1-TGL). \* $P < 0.05$ , \*\* $P < 0.01$ , paired t test. Time 0 is the time when the 40 pre-post  
987 repetitions of the induction protocol were completed. (D) Experimental protocol for the induction  
988 of t-LTP (pre-post timing of + 7 ms) in two clustered dendritic spines (< 30 $\mu\text{m}$ ) in the presence  
989 Latrunculin-A (Lat-A, 100nM). (E) Example of one experiment where two neighbouring dendritic  
990 spines were activated with a pre-post t-LTP protocol in the presence of Lat-A. (E.1) Average  
991 uEPSP recorded via a whole-cell pipette at the soma of L5 pyramidal neurons before (Control) and  
992 after the induction of t-LTP in two selected dendritic spines (red dots, E.2) located in basal



Tazerart, Mitchell et al.

993 dendrites (E.2). Traces in E.1 correspond to an average of 10 uEPSP generated by the 2P uncaging  
994 over the two indicated spines (red dots, E.2) before (black trace) and after the induction of t-LTP  
995 in the presence of Lat-A (red trace). (F.1) Time course of uEPSP amplitude (black line), neck  
996 length (red line) and spine head volume (blue line) changes over the course of ~12 min following  
997 STDP induction in clustered spines at a pre-post timing of + 7 ms in the presence of Lat-A. *ns*, not  
998 significant; \*\*P < 0.01, \*\*\*P < 0.001, one-way repeated measures ANOVA followed by post hoc  
999 Dunnet's test. (F.2) Pooled data of the maximum changes in uEPSP amplitude (black bar and dots)  
1000 and concomitant changes in neck length (red bar and dots) and head volume (blue bar and dots) of  
1001 the activated clustered spines after the induction of t-LTP at a pre-post timing of +7 ms in control  
1002 conditions (Cont) and in the presence of Lat-A (Lat-A). \*\*P < 0.01, \*\*\*P < 0.001, paired t test.  
1003 NL = neck length, HV = head volume. Shaded light area in C.1 and F.1 and error bars in C.2 and  
1004 F.2 represent  $\pm$ SEM. Time 0 is the time when 40 pre-post repetitions of the induction protocol  
1005 were completed.

Tazerart, Mitchell et al.

1006 **Figure 5. Induction of t-LTD in clustered and distributed dendritic spines:** (A) Experimental  
1007 protocol for the induction of t-LTD protocol (pairings of - 15 ms) in two clustered dendritic spines  
1008 ( $< 40 \mu\text{m}$ ). (B) An example of one experiment where two neighbouring dendritic spines were  
1009 activated with a post-pre t-LTP protocol of -15 ms. (B.1) Average uEPSP recorded via a whole-  
1010 cell pipette at the soma of L5 pyramidal neurons before (Control) and after the induction of t-LTD  
1011 in two selected dendritic spines (red dots, B.2) located in basal dendrites. Traces in B.1 correspond  
1012 to an average of 10 uEPSP generated by 2P uncaging of glutamate at the indicated spines before  
1013 (black trace) and after the induction of t-LTD (red trace). (C.1) Time course of uEPSP amplitude  
1014 (black line), the neck length (red line) and spine head volume (blue line) of the activated clustered  
1015 spines after the induction of t-LTD at pairings of -15 ms. *ns*, not significant; \* $P < 0.05$ , one-way  
1016 repeated measures ANOVA followed by post hoc Dunnet's test. (C.2) Pooled data of the maximum  
1017 changes in uEPSP amplitude (black bar and dots) and concomitant changes in neck length (red bar  
1018 and dots) and head volume (blue bar and dots) of individual (1sp) or clustered spines (2sp) after  
1019 the induction of t-LTD at a post-pre timing of -15 ms. \* $P < 0.05$ , \*\* $P < 0.01$ , paired t test. Time  
1020 0 in C.1 is the time when the 40 pre-post repetitions of the induction protocol were completed. NL  
1021 = neck length, HV = head volume. (D) Experimental protocol for the t-LTD induction protocol  
1022 (pre-post timing of - 15 ms) in two distributed dendritic spines ( $> 40 \mu\text{m}$ ). (E) An example of one  
1023 experiment where two distributed dendritic spines were activated with a post-pre t-LTP induction  
1024 protocol of -15 ms. (E.1) Average uEPSP recorded via a whole-cell pipette at the soma of L5  
1025 pyramidal neurons before (Control, underneath image, E.2) and 3 min after the induction of t-LTD  
1026 (E.2, over imposed image) in two selected dendritic spines located in basal dendrites. (E.2) Inset  
1027 shows a low magnification image of the recorded neuron with the marked location of the selected  
1028 spines. Traces in E.1 correspond to an average of 10 uEPSP generated by 2P uncaging at the

Tazerart, Mitchell et al.

1029 indicated spines (red dots, E.2) before (black trace) and after the induction of t-LTD (red trace).  
1030 (F.1) Time course of uEPSP amplitude (black line), the neck length (red line) and spine head  
1031 volume (blue line) of the activated distributed spines ( $> 40 \mu\text{m}$ ) after the induction of t-LTD at  
1032 pairings of -15 ms. *ns*, not significant; \* $P < 0.05$ , \*\* $P < 0.01$ , one-way repeated measures ANOVA  
1033 followed by post hoc Dunnet's test. (F.2) Pooled data of the maximum changes in uEPSP  
1034 amplitude (black bar and dots) and corresponding changes in neck length (red bar and dots) and  
1035 head volume (blue bar and dots) of clustered (2sp at  $< 40 \mu\text{m}$ ) or distributed spines (2sp at  $> 40$   
1036  $\mu\text{m}$ ) after the induction of t-LTD at a post-pre timing of -15ms. \* $P < 0.05$ , paired t test. Shaded  
1037 light area in C.1 and F.1 and error bars in C.2 and F.2 represent  $\pm\text{SEM}$ . Time 0 in C.1 and F.1 is  
1038 the time when the 40 pre-post repetitions of the induction protocol were completed. NL = neck  
1039 length, HV = head volume.

1040

Tazerart, Mitchell et al.

1041 **Figure 6. Calcium dynamics in single and two clustered spines during pre-post pairing**  
1042 **protocol.** (A.1) Single 2P images of a spine and dendrite from a L5 pyramidal neuron loaded with  
1043 Alexa 594 (100uM) and Fluo4 (300uM). Red ellipses and blue polygons indicate the ROIs selected  
1044 for the calcium signal analysis. (A.2) Two photon calcium signal images before (left panels) and  
1045 after (right panels) a pre-post pairing protocol (+7 ms). The 1<sup>st</sup>, 2<sup>nd</sup>, and 40<sup>th</sup> repetitions of the  
1046 pairing protocol are shown here. The change in calcium fluorescence from baseline ( $\Delta F$ ) is color  
1047 coded. (B) Calcium signals ( $\Delta F/F$ ) in the spine (B.1) and dendrite (B.2) from the experiment  
1048 depicted in A before (dotted lines) and after (solid lines) the pairing protocol. (C) Population  
1049 averages of the calcium signals ( $\Delta F/F$ ) measured in spines (C.1) and dendrites (C.2) before the  
1050 pairing protocol performed in 1 spine (left panels) and 2 spines (middle panels). The right panels  
1051 shows the superimposed  $\Delta F/F$  population averages in 1 spine (black lines) and 2 spines (green  
1052 lines). (D.1) Single 2P images of two clustered spines and dendrite from a L5 pyramidal neuron  
1053 loaded with Alexa 594 (100uM) and Fluo4 (300uM). Red ellipses and blue polygons indicate the  
1054 ROIs selected for the calcium signal analysis. (D.2) Two photon calcium signal images before (left  
1055 panel) and after (right panels) a pre-post pairing protocol (+ 7ms). The 1<sup>st</sup>, 2<sup>nd</sup>, and 40<sup>th</sup> repetitions  
1056 of the pairing protocol are shown here. The change in calcium fluorescence from baseline ( $\Delta F$ ) is  
1057 color coded. (E) Calcium signals ( $\Delta F/F$ ) in the spines (E.1) and dendrite (E.2) before (dotted lines)  
1058 and after (solid lines) the pairing protocol. (F) Population averages of the calcium signals ( $\Delta F/F$ )  
1059 measured in spines (F1) and dendrites (F.2) after the pairing protocol performed in one spine (left  
1060 panels) and two spines (middle panels). The right panels shows the superimposed  $\Delta F/F$  population  
1061 averages in one spine (black lines) and two spines (green lines). *ns*, not significant; \* $P < 0.05$ ; \*\* $P$   
1062  $< 0.01$ ; \*\*\* $P < 0.001$ , one-way repeated measures ANOVA followed by post hoc Dunnet's test.

Tazerart, Mitchell et al.

1063 **Figure 7. Calcium dynamics in single and two clustered spines during post-pre pairing**  
1064 **protocol.** (A1) Single 2P images of a spine and dendrite from a L5 pyramidal neuron loaded with  
1065 Alexa 594 (100uM) and Fluo4 (300uM). Red ellipses and blue polygons indicate the ROIs selected  
1066 for the calcium signal analysis. (A.2) Two photon calcium signal images before (left panels) and  
1067 after (right panels) a post-pre pairing protocol (-15 ms). The 1<sup>st</sup>, 2<sup>nd</sup>, and 40<sup>th</sup> repetitions of the  
1068 pairing protocol are shown here. The change in calcium fluorescence from baseline ( $\Delta F$ ) is color  
1069 coded. (B) Calcium signals ( $\Delta F/F$ ) in the spine (B.1) and dendrite (B.2) from the experiment  
1070 depicted in A before (dotted lines) and after (solid lines) the pairing protocol. (C) Population  
1071 averages of the calcium signals ( $\Delta F/F$ ) measured in spines (C.1) and dendrites (C.2) before the  
1072 pairing protocol performed in one spine (left panels) and two spines (middle panels). The right  
1073 panels shows the superimposed  $\Delta F/F$  population averages in one spine (black lines) and two spines  
1074 (green lines). (D.1) Single 2P images of two clustered spines and dendrite from a L5 pyramidal  
1075 neuron loaded with Alexa 594 (100uM) and Fluo4 (300uM). Red ellipses and blue polygons  
1076 indicate the ROIs selected for the calcium signal analysis. (D.2) Two photon calcium signal images  
1077 before (left panel) and after (right panels) a pre-post pairing protocol (-15 ms). The 1<sup>st</sup>, 2<sup>nd</sup>, and  
1078 40<sup>th</sup> repetitions of the pairing protocol are shown here. The change in calcium fluorescence from  
1079 baseline ( $\Delta F$ ) is color coded. (E) Calcium signals ( $\Delta F/F$ ) in the spines (E.1) and dendrite (E.2)  
1080 before (dotted lines) and after (solid lines) the pairing protocol. (F) Population averages of the  
1081 calcium signals ( $\Delta F/F$ ) measured in spines (F1) and dendrites (F2) after the pairing protocol  
1082 performed in one spine (left panels) and two spines (middle panels). The right panels shows the  
1083 superimposed  $\Delta F/F$  population averages in 1 spine (black lines) and 2 spines (green lines). *ns*, not  
1084 significant; \* $P < 0.05$ ; \*\* $P < 0.01$ ; \*\*\* $P < 0.001$ , one-way repeated measures ANOVA followed  
1085 by post hoc Dunnet's test.

1086

Tazerart, Mitchell et al.

1087 **Figure 8. STDP learning rule for single distributed and clustered dendritic spines.** (A) STDP  
1088 learning rule in the basal dendrites of L5 pyramidal neurons as a function of the structural  
1089 organization of excitatory inputs in basal dendrites of L5 pyramidal neurons. Note how STDP in  
1090 single, or distributed spines (separated by  $> 40 \mu\text{m}$ ), follow a bidirectional Hebbian STDP rule that  
1091 can be disrupted by synaptic cooperativity [co-activation of two clustered spines]. We propose that  
1092 synaptic cooperativity generates local dendritic depolarization high enough to disrupt bidirectional  
1093 STDP, leading to STDP that only encompasses LTP. (B) Model showing a hypothetical  
1094 relationship between postsynaptic calcium levels and the induction of plasticity. Large levels of  
1095 calcium (above a potentiation threshold,  $\Theta_{\text{pSTART}}$ ) are thought to lead to t-LTP whereas more  
1096 moderate, prolonged levels (between the depression threshold,  $\Theta_{\text{dSTART}}$ , and  $\Theta_{\text{dSTOP}}$ ) give rise to  
1097 t-LTD and a mid-level range in which neither t-LTP nor t-LTD occur (below  $\Theta_{\text{dSTART}}$ ). The average  
1098 linear fits of the calcium signal measured in all experiments throughout the different STDP  
1099 induction protocols are superimposed.

Figure 1

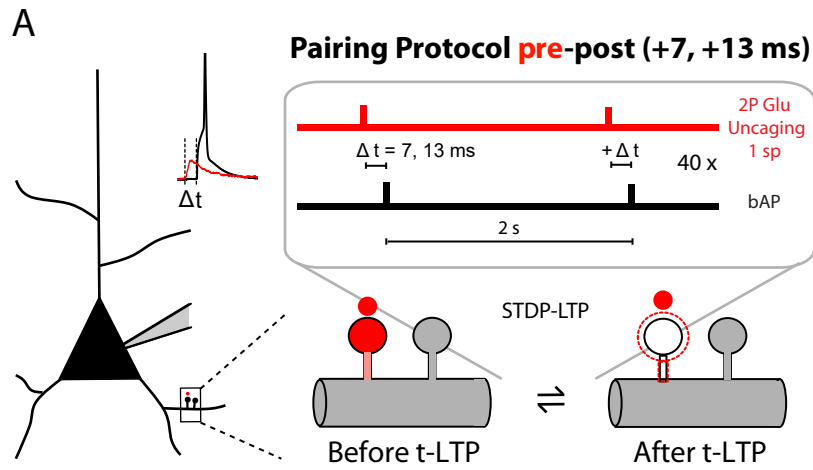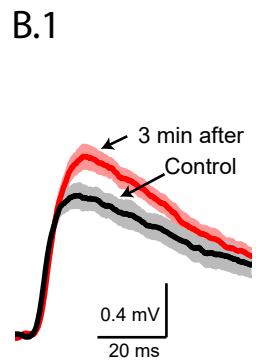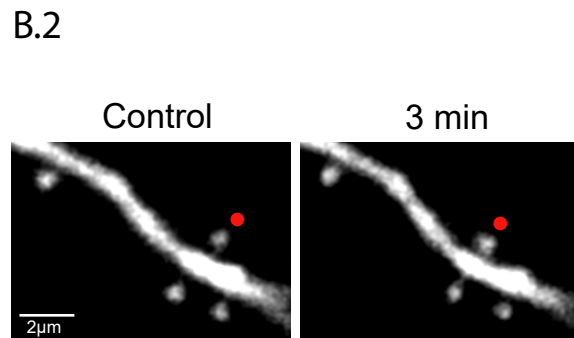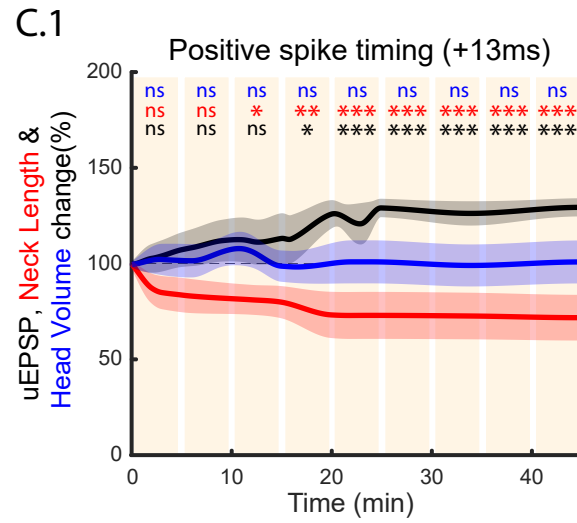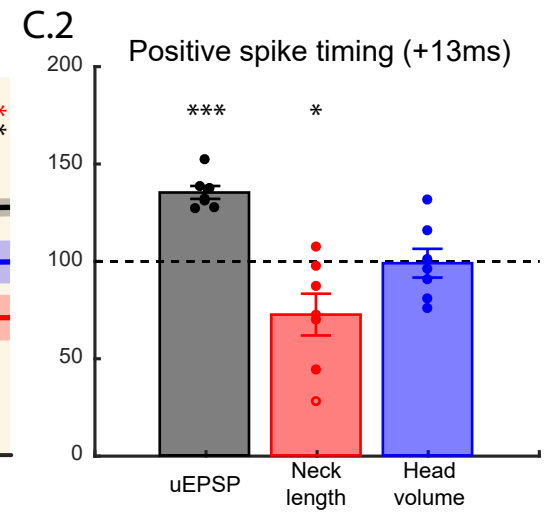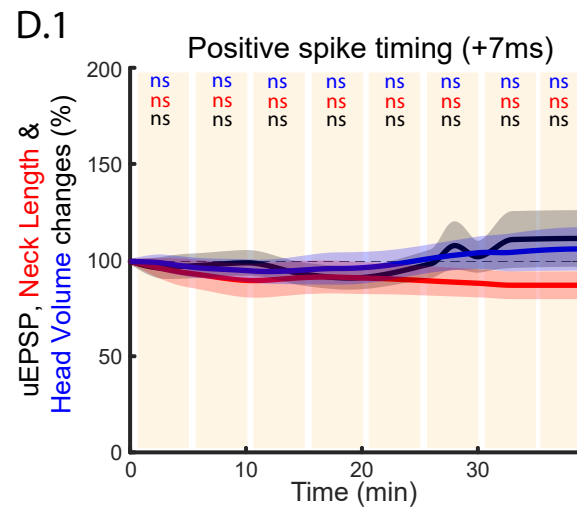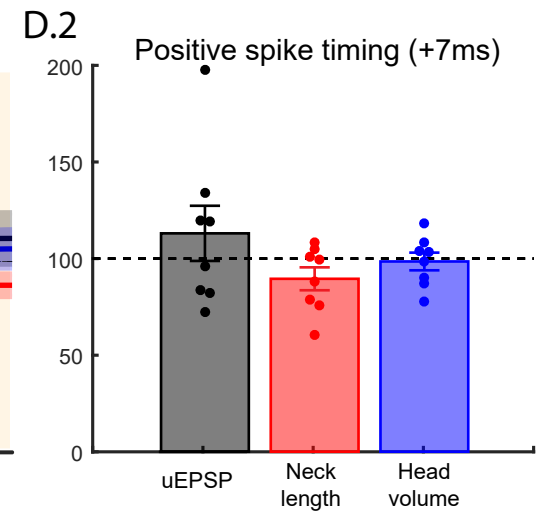

Figure 2

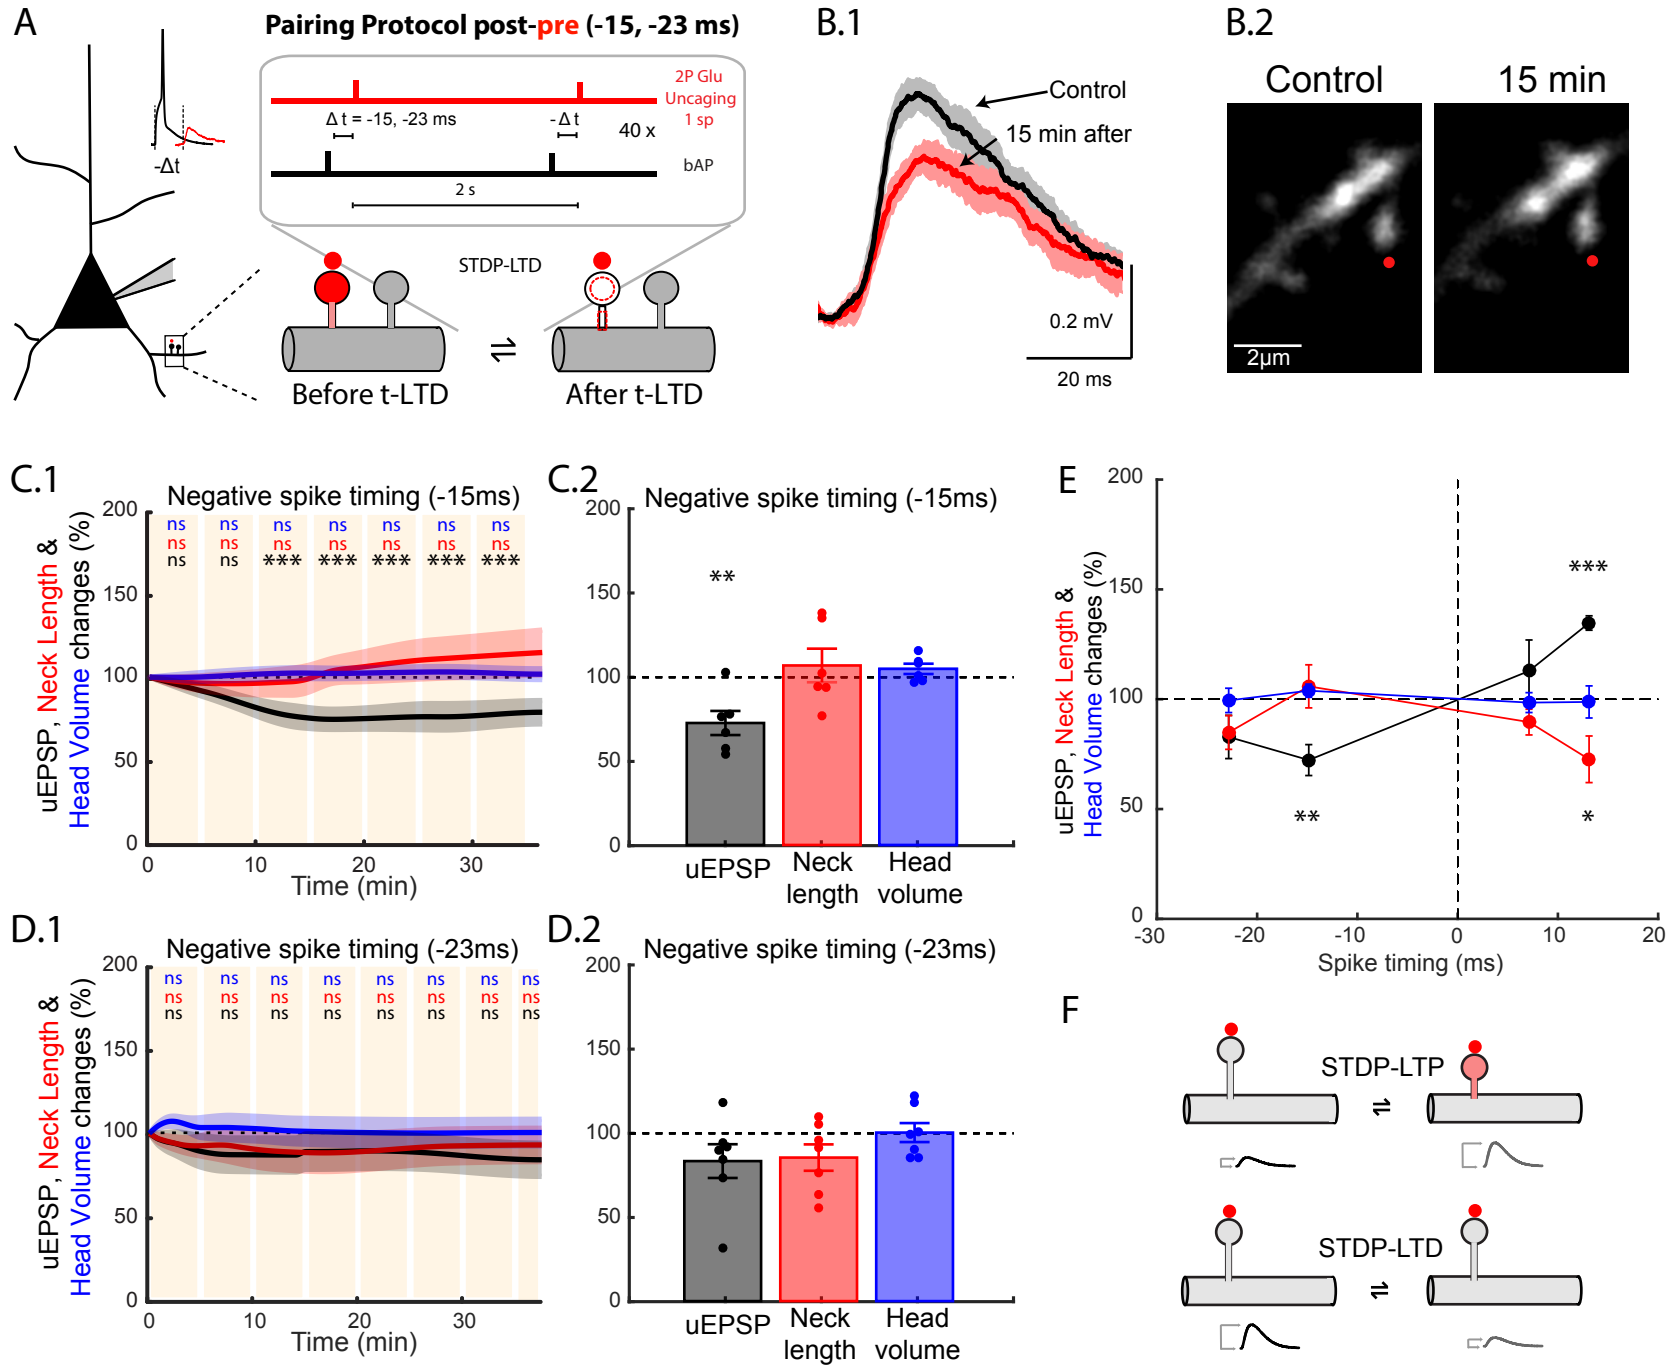



Figure 3

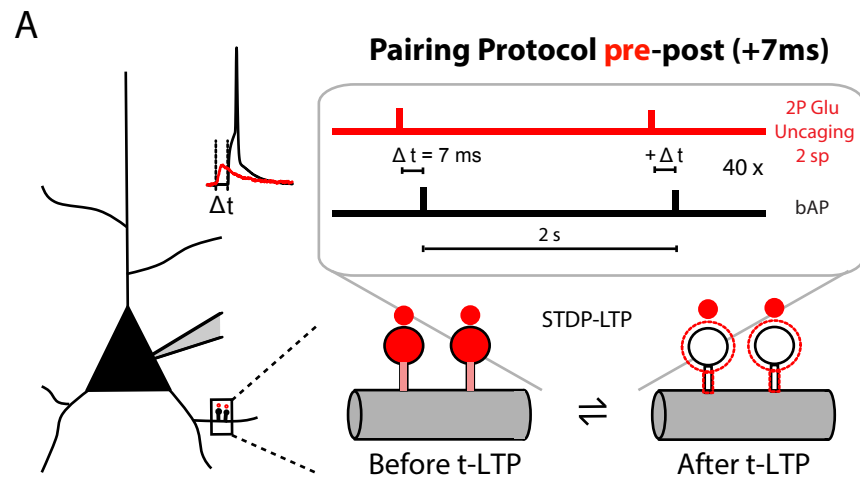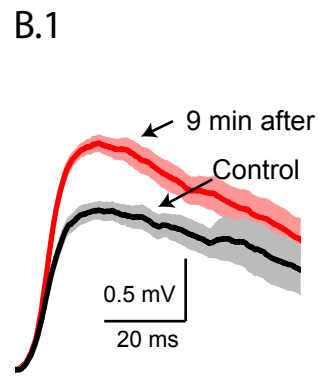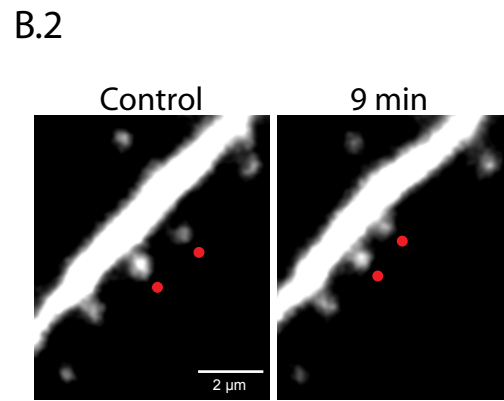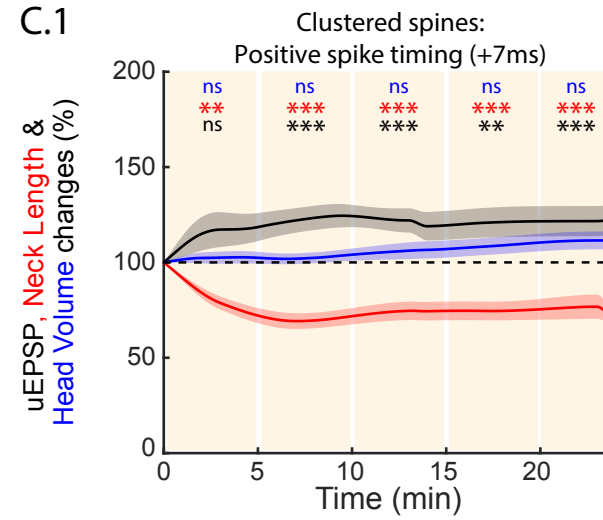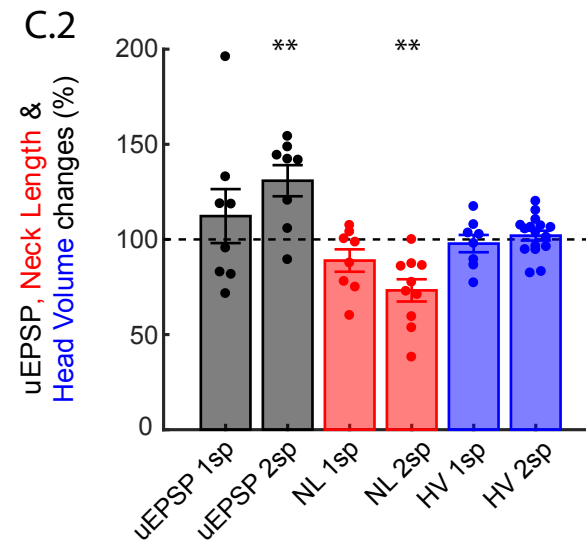

# Figure 4

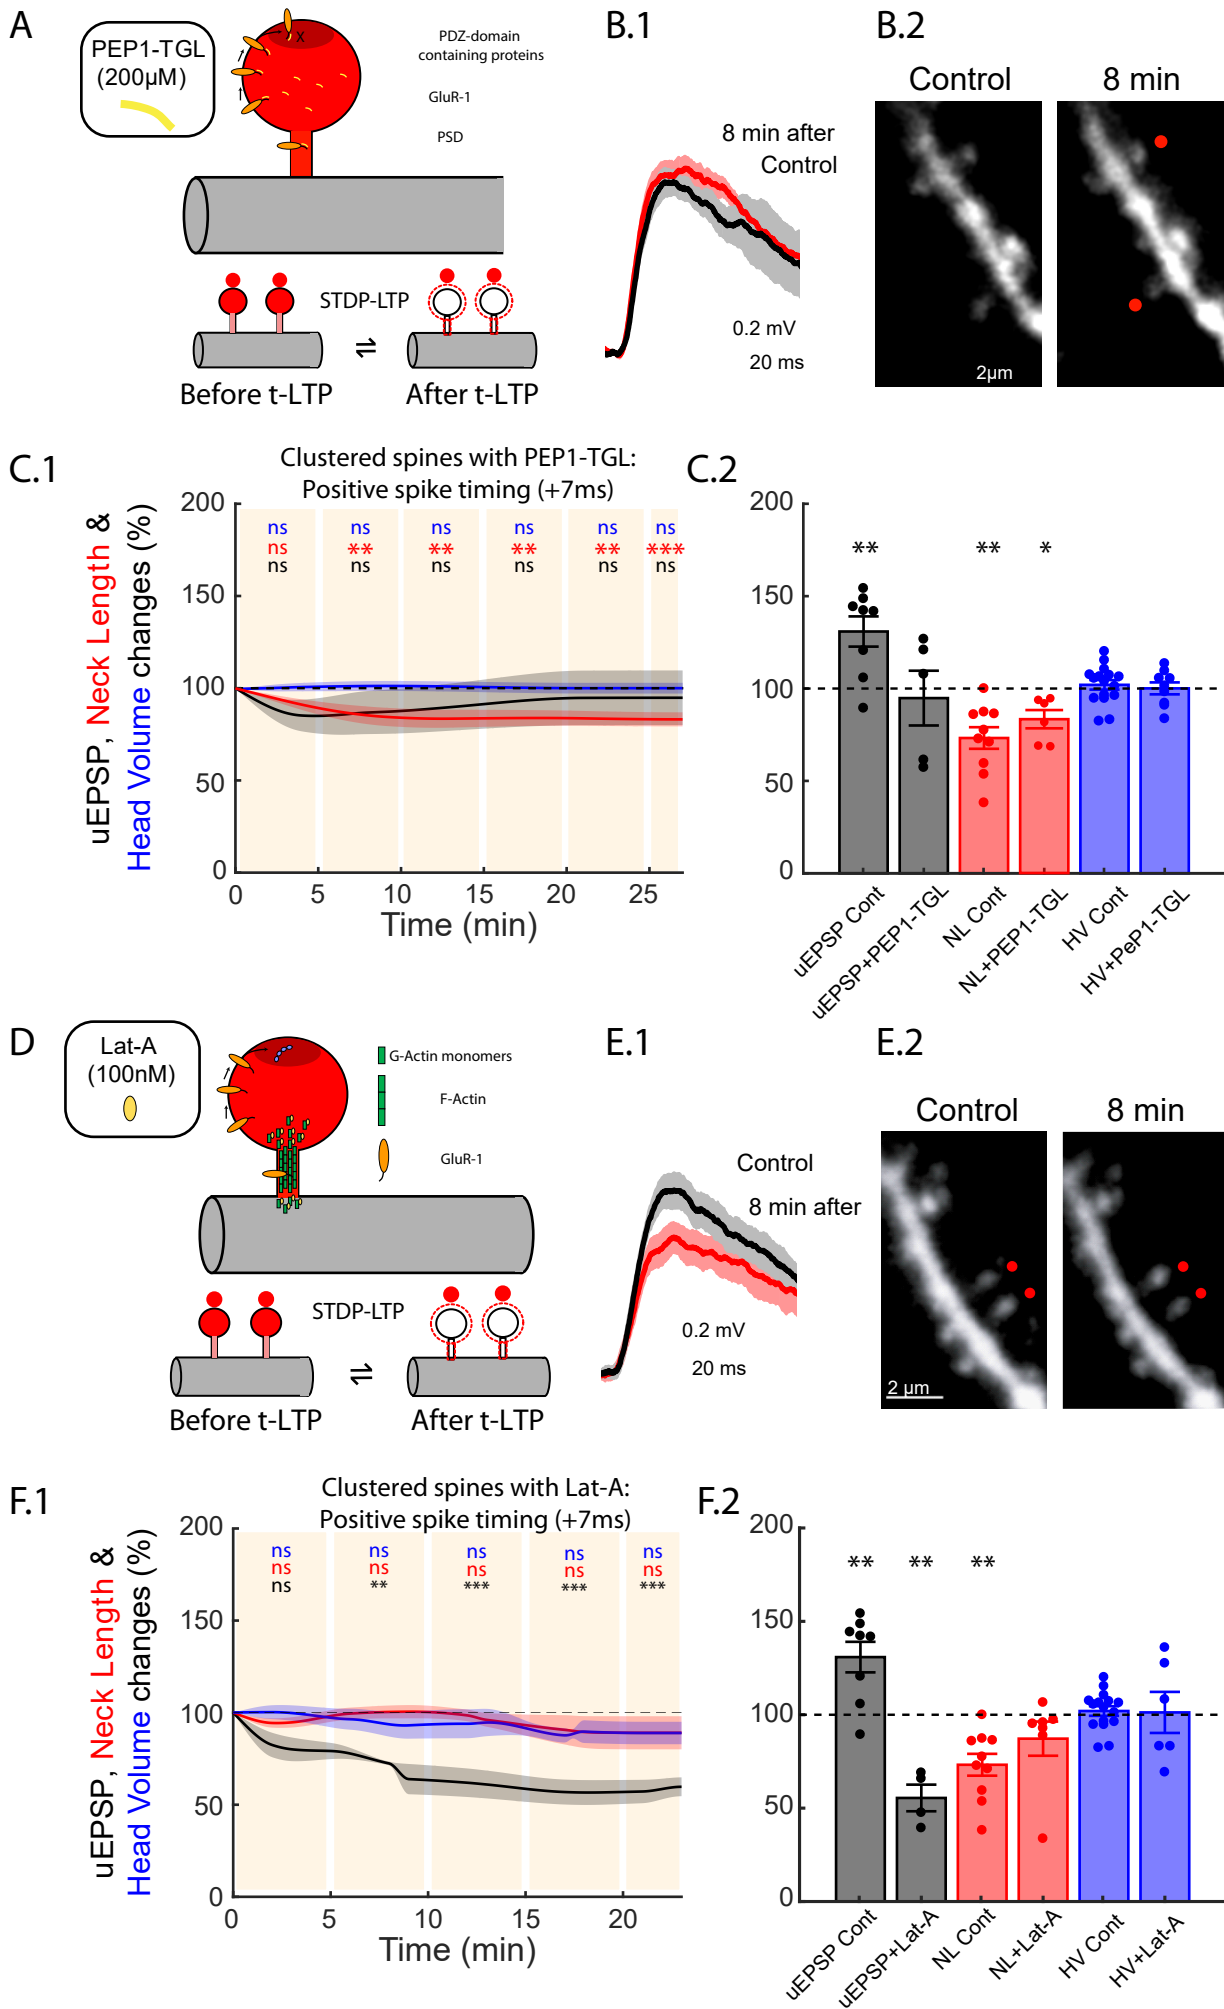

Figure 5

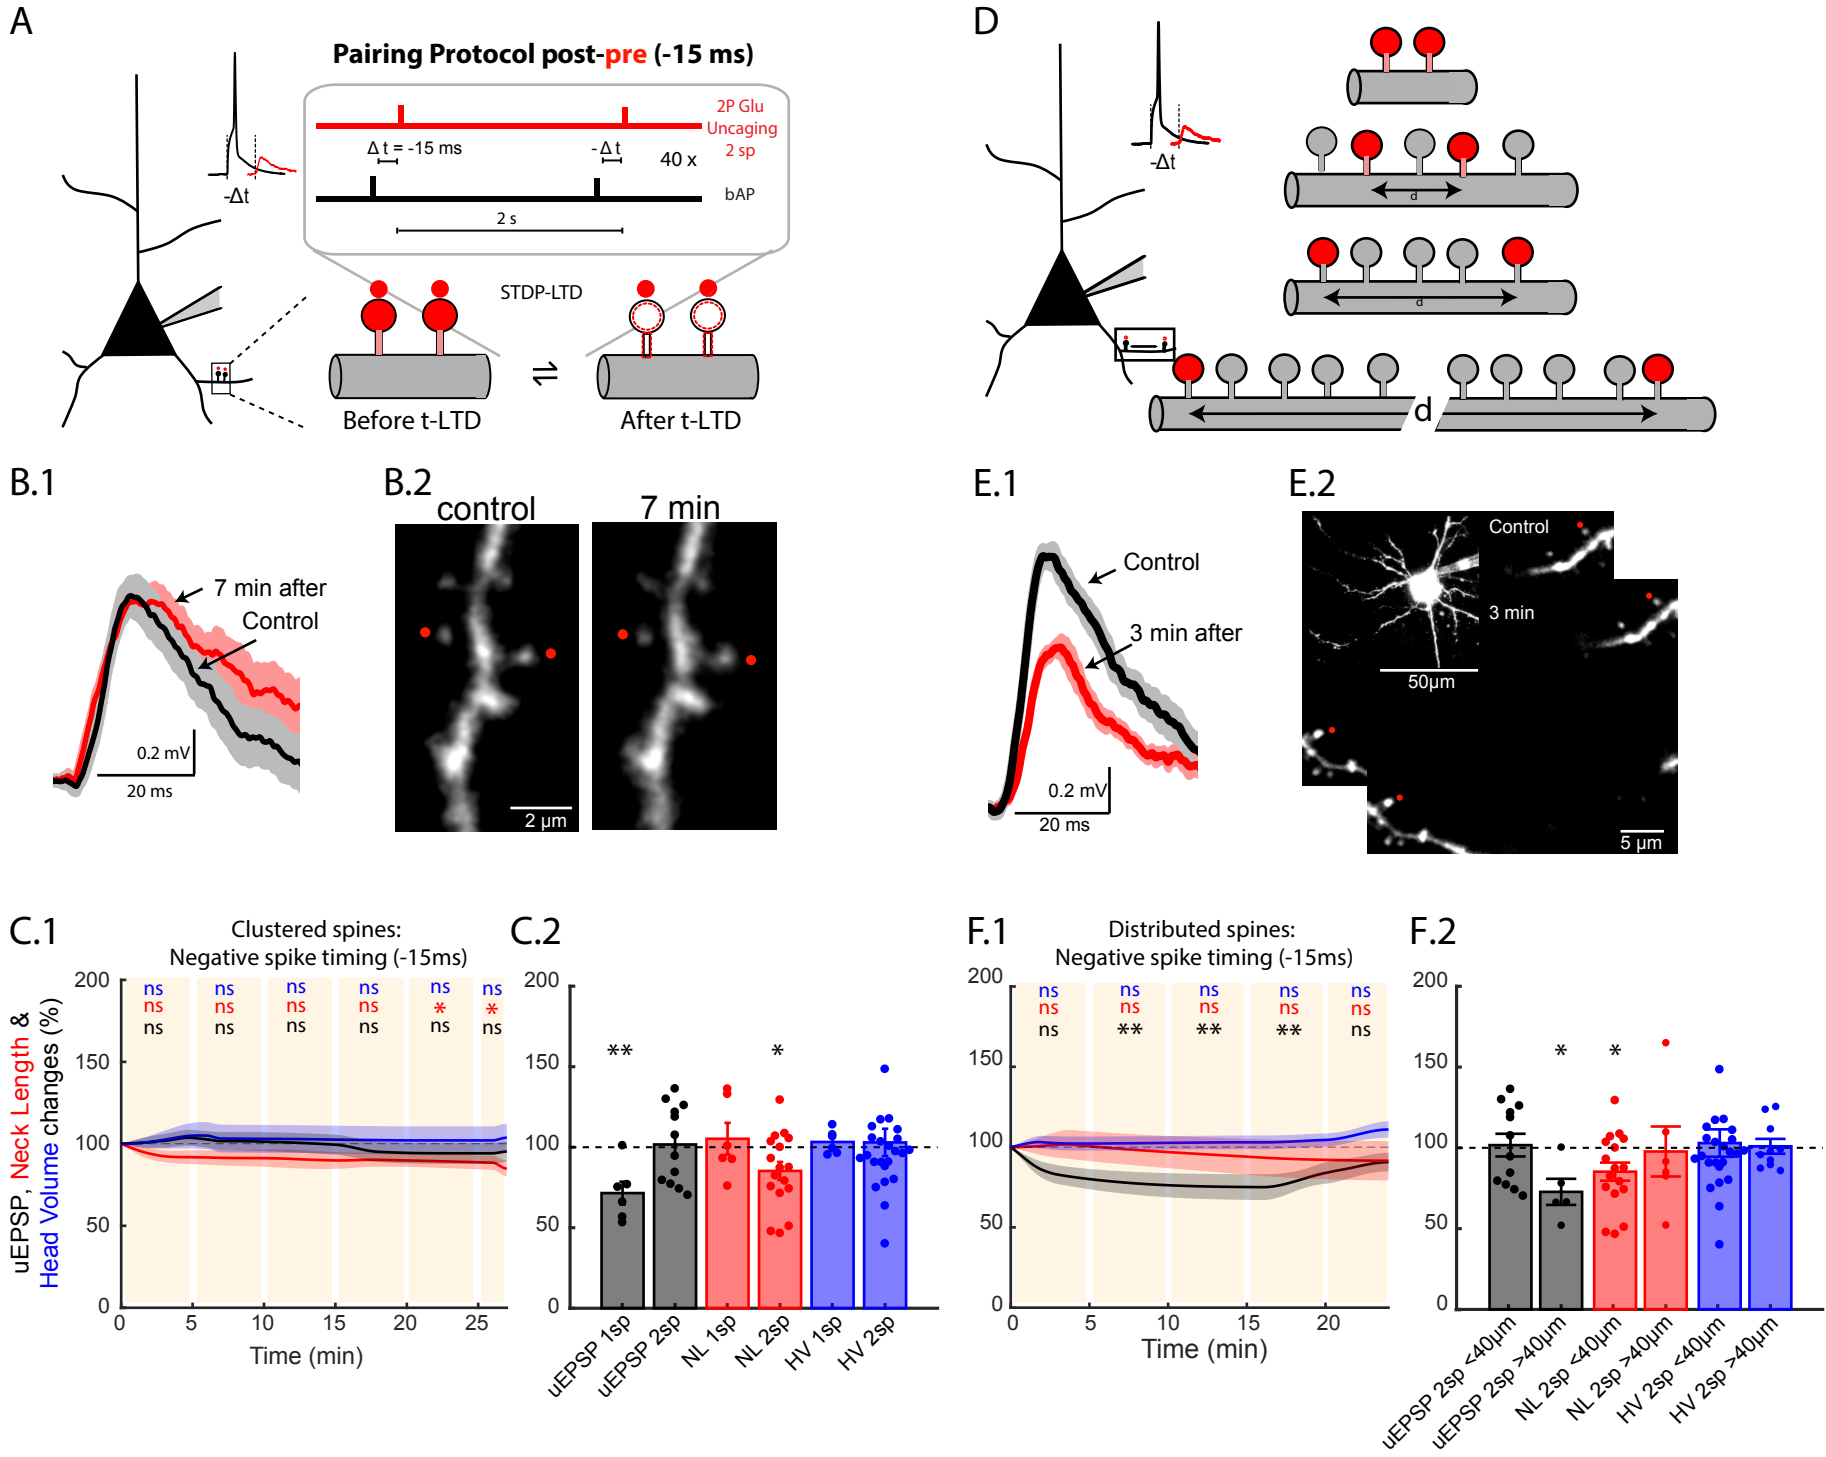

Figure 6

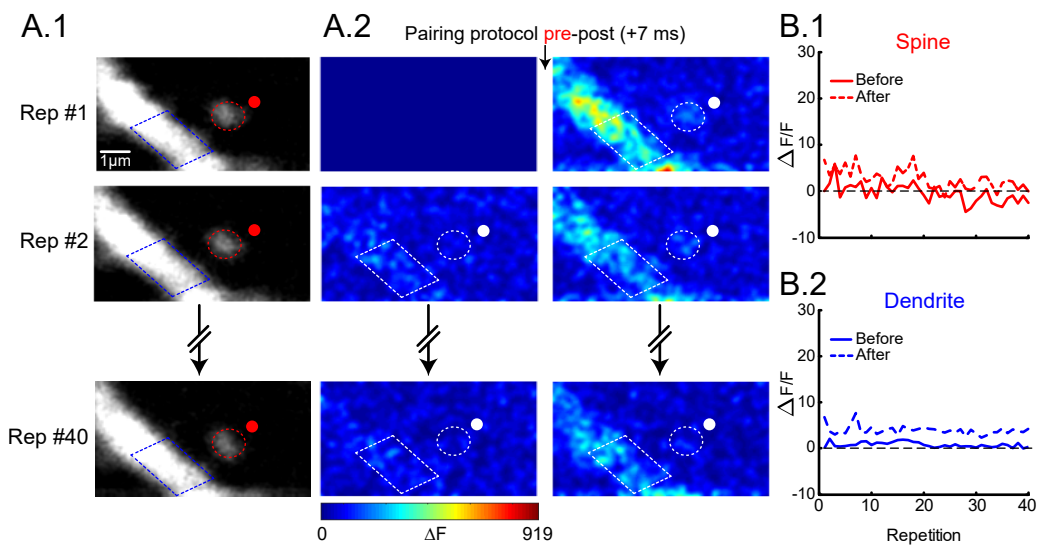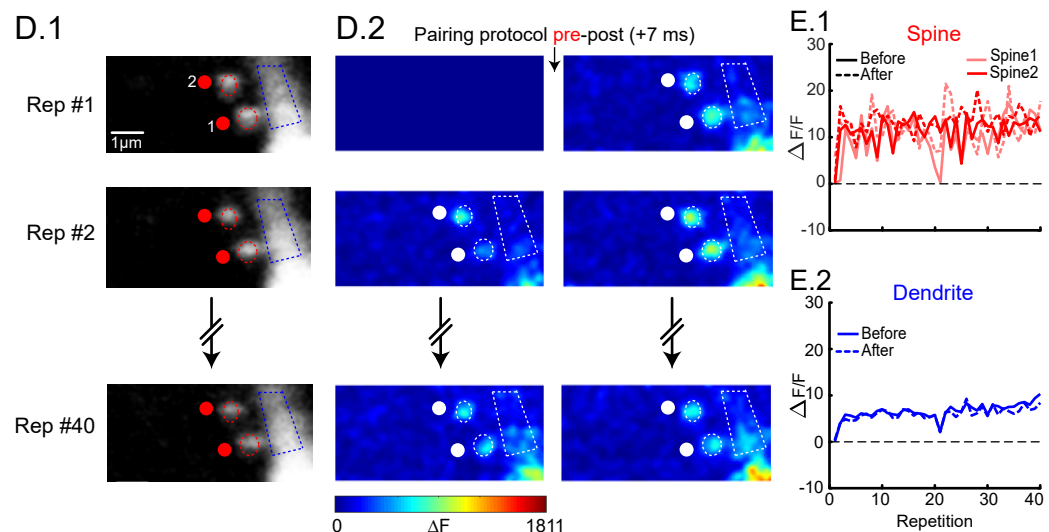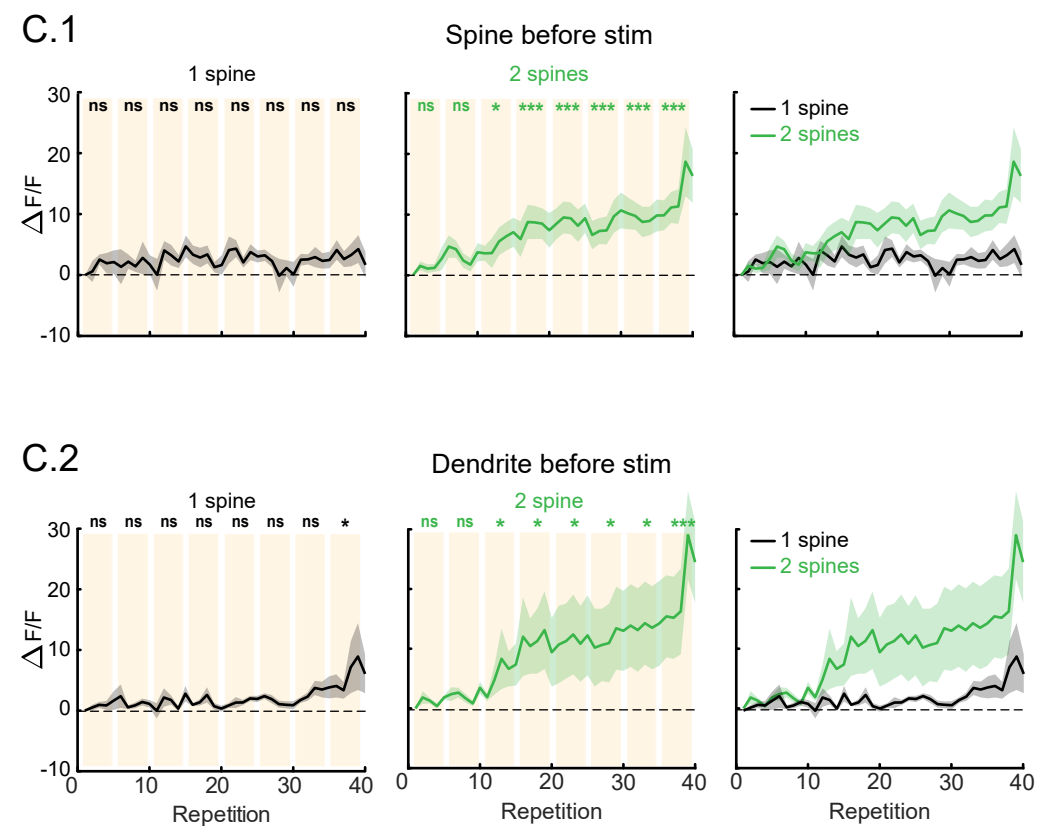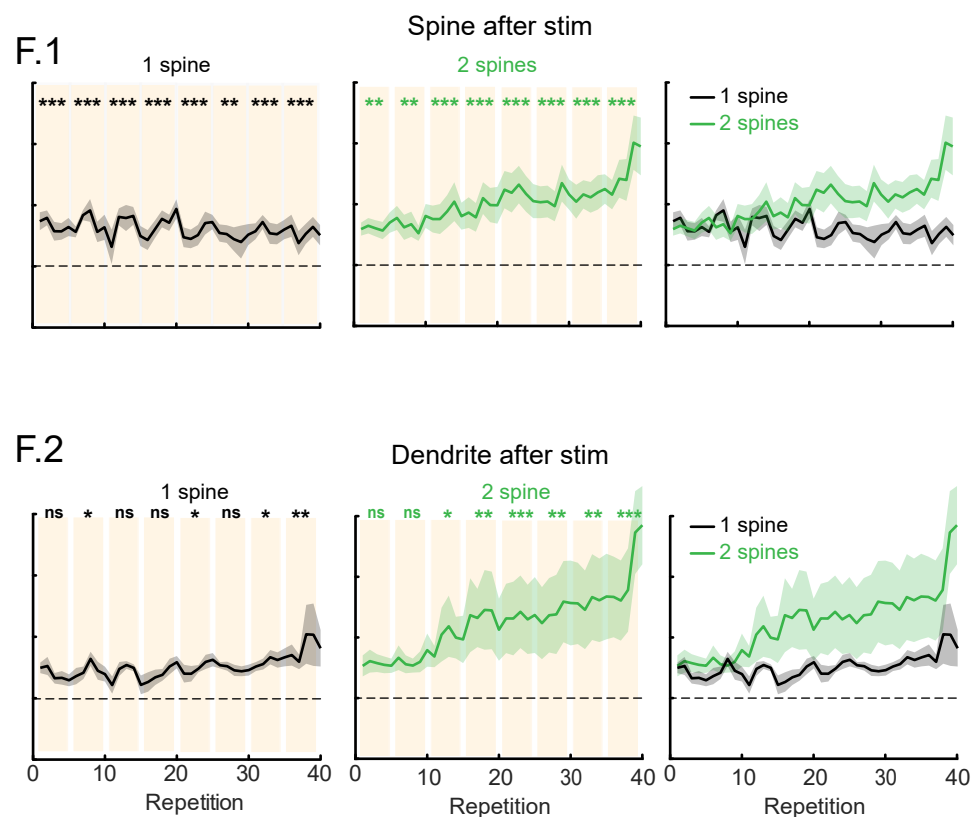

Figure 7

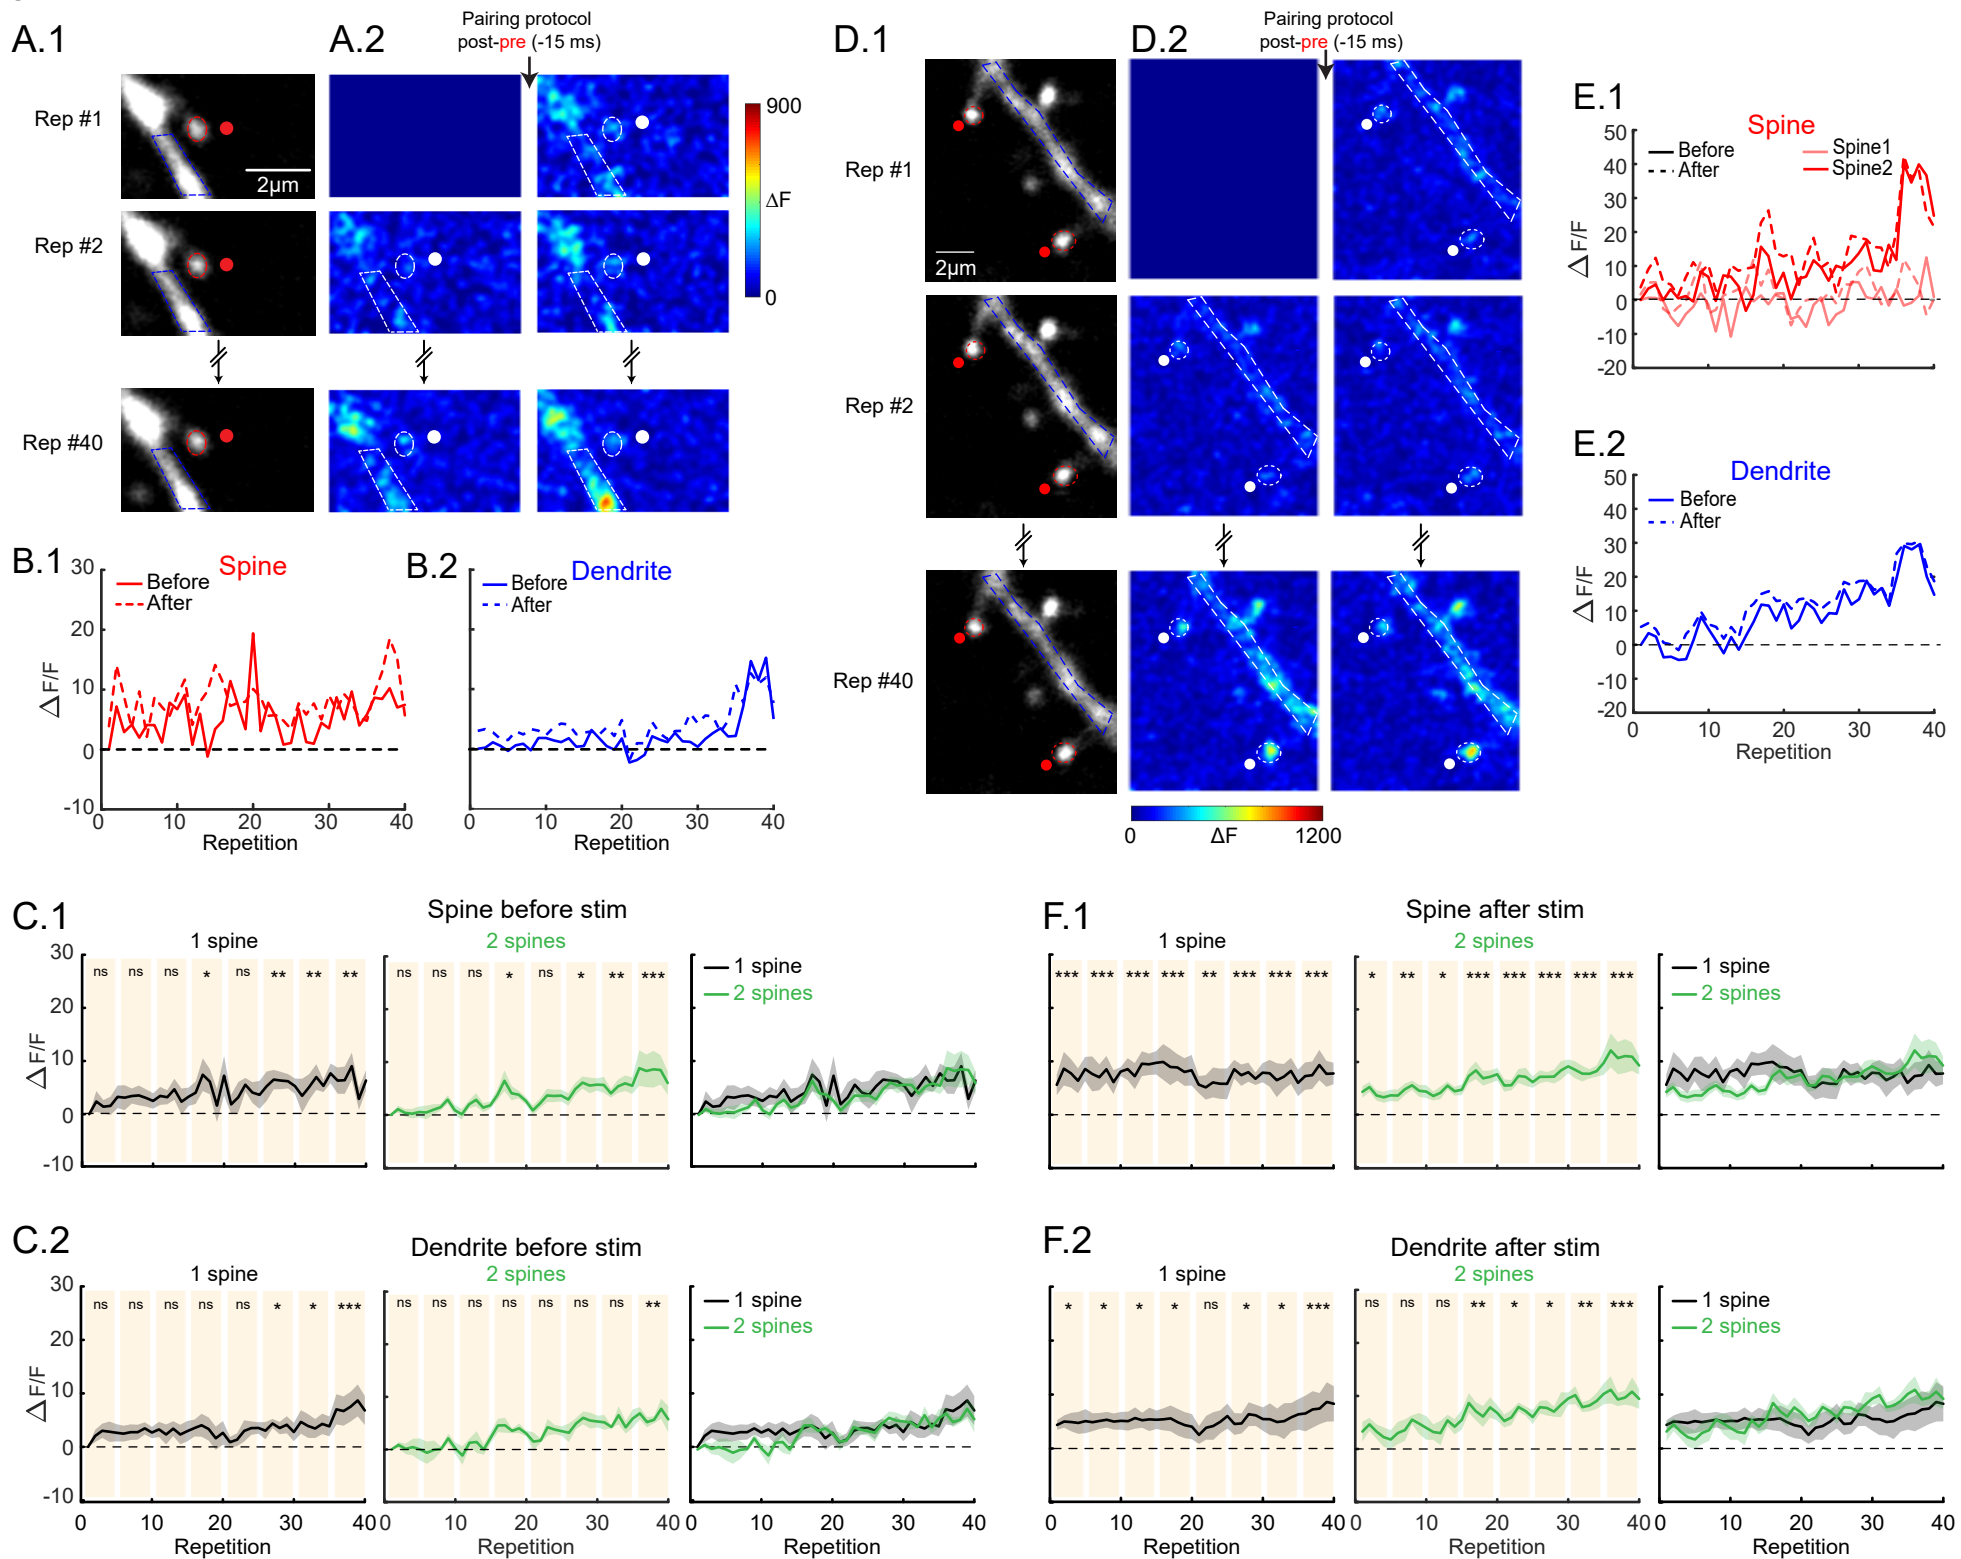

Figure 8

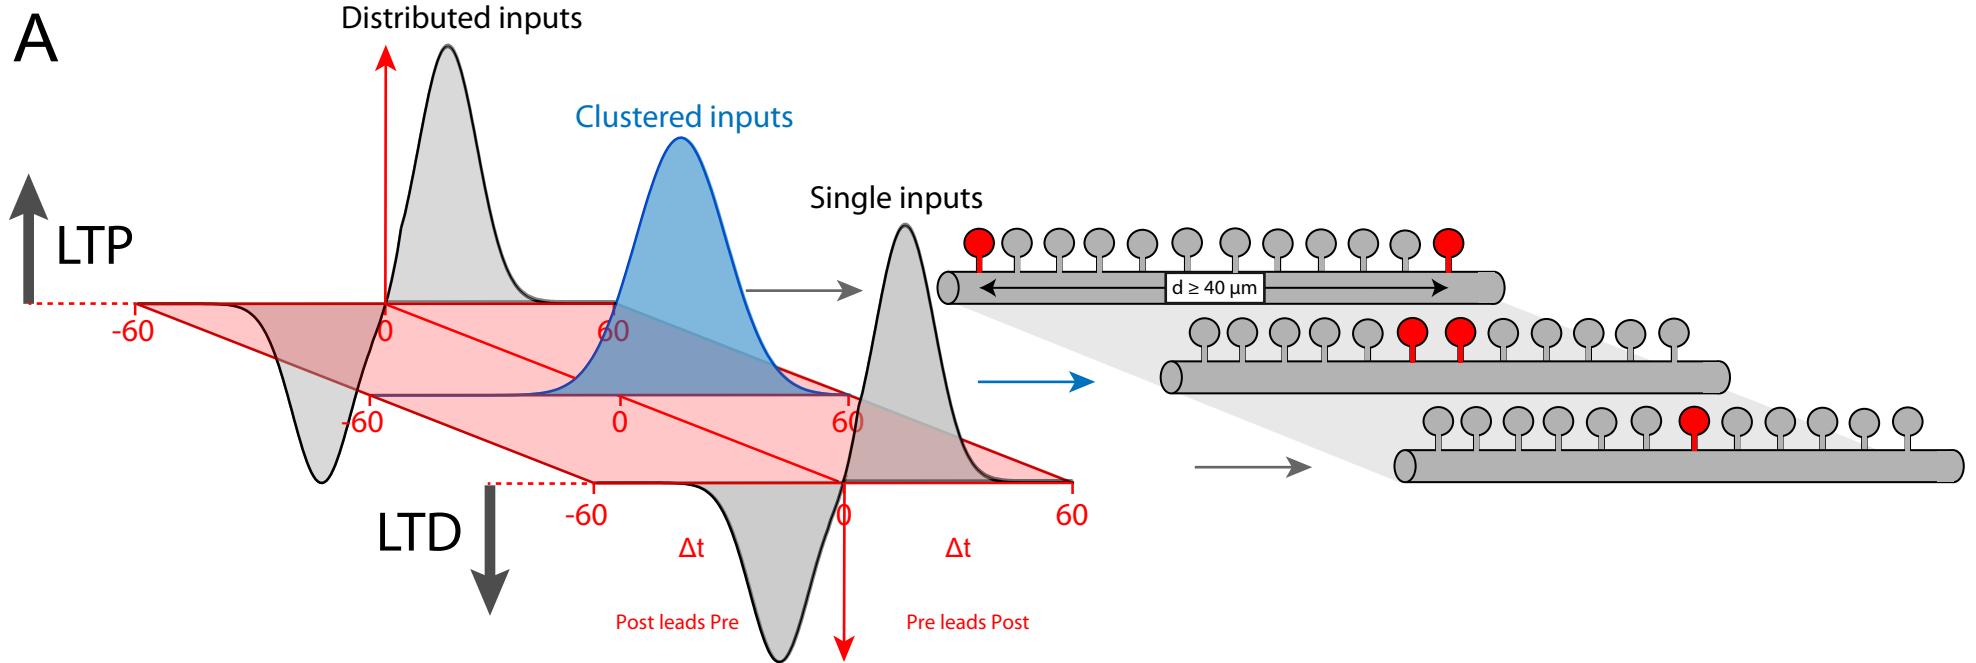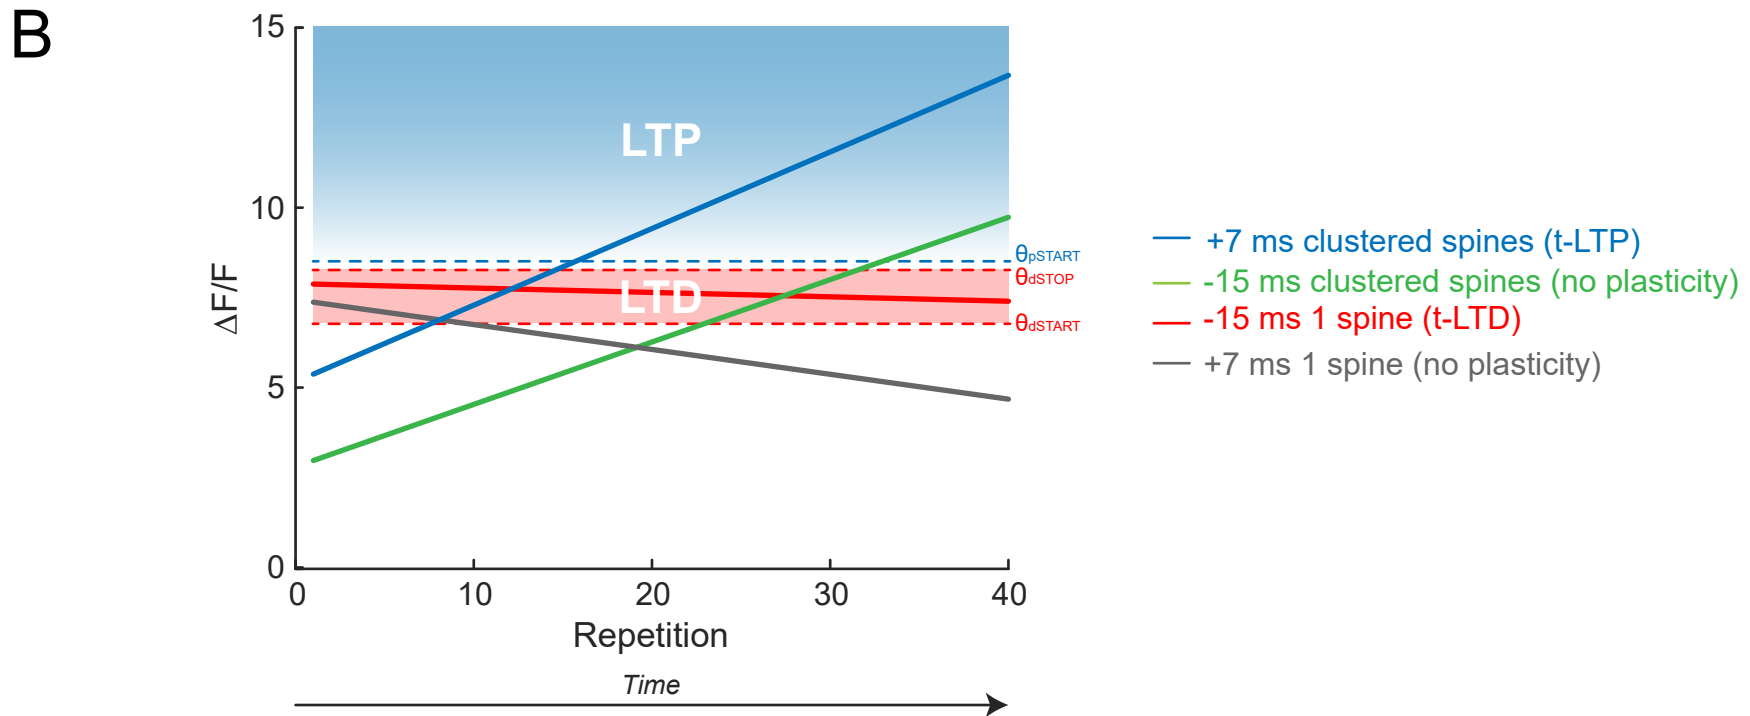

Source: http://biorxiv.org/content/10.1101/397323v1.full.pdf
